# Supplementary material
Source: PubMed Central journal article supplement (PMC7524343)
Supplement: KGMI_A_1748261_SM2392.pdf [file KGMI_A_1748261_SM2392.pdf]

# Supporting Information

## **Metagenomic analysis of the human microbiome reveals the association between the abundance of gut bile salt hydrolases and host health**

Baolei Jia<sup>a,b\*</sup>, Dongbin Park<sup>b\*</sup>, Yoonsoo Hahn<sup>b</sup>, and Che Ok Jeon<sup>b</sup>

<sup>a</sup> State Key Laboratory of Biobased Material and Green Papermaking, School of Bioengineering, Qilu University of Technology (Shandong Academy of Sciences), Jinan, China; <sup>b</sup> Department of Life Science, Chung-Ang University, Seoul, Republic of Korea

CONTACT Che Ok Jeon [cojeon@cau.ac.kr](mailto:cojeon@cau.ac.kr). Department of Life Science, Chung-Ang University, Seoul 06974, Republic of Korea; [baoleijia@cau.ac.kr](mailto:baoleijia@cau.ac.kr), Department of Life Science, Chung-Ang University, Seoul 06974, Republic of Korea.

\*These authors contributed equally to this work.

**Supplementary Table S1. Characteristics of the experimentally characterized bile salt hydrolases.**

| <b>Entry</b> | <b>Organism</b>                          | <b>Length</b> | <b>Cluster</b> | <b>References</b>          |
|--------------|------------------------------------------|---------------|----------------|----------------------------|
| Q1WR93       | <i>Lactobacillus salivarius</i>          | 316           | Cluster2       | (Fang et al., 2009)        |
| C7AQX8       | <i>Lactobacillus salivarius</i>          | 324           | Cluster2       | (Fang et al., 2009)        |
| C7AQY2       | <i>Lactobacillus salivarius</i>          | 324           | Cluster2       | (Bi et al., 2013)          |
| C7AQX9       | <i>Lactobacillus salivarius</i>          | 325           | Cluster2       | (Bi et al., 2013)          |
| J7H3P9       | <i>Lactobacillus salivarius</i>          | 324           | Cluster2       | (Wang et al., 2012)        |
| A0A0R2G1E1   | <i>Lactobacillus plantarum</i>           | 324           | Cluster2       | (Ren et al., 2011)         |
| Q06115       | <i>Lactobacillus plantarum</i>           | 324           | Cluster2       | (Christiaens et al., 1992) |
| M1R991       | <i>Lactobacillus plantarum</i>           | 328           | Cluster2       | (Gu et al., 2014)          |
| M1R367       | <i>Lactobacillus plantarum</i>           | 317           | Cluster6       | (Gu et al., 2014)          |
| B9V405       | <i>Lactobacillus gasseri</i>             | 325           | Cluster2       | (Jiang et al., 2010)       |
| A0A1Y0E209   | <i>Lactobacillus gasseri</i>             | 326           | Cluster2       | (Rani et al., 2017)        |
| Q5FKM3       | <i>Lactobacillus acidophilus</i>         | 325           | Cluster2       | (McAuliffe et al., 2005)   |
| Q5FK51       | <i>Lactobacillus acidophilus</i>         | 325           | Cluster2       | (McAuliffe et al., 2005)   |
| A5VJH0       | <i>Lactobacillus reuteri</i>             | 325           | Cluster2       | (Bustos et al., 2016)      |
| A0A1B3PS02   | <i>Lactobacillus johnsonii</i>           | 326           | Cluster2       | (Chae et al., 2013)        |
| A5HKP3       | <i>Lactobacillus acidophilus</i>         | 316           | Cluster2       | (Chae et al., 2013)        |
| A0A2M9NK78   | <i>Lactobacillus johnsonii</i>           | 325           | Cluster2       | (Chae et al., 2013)        |
| Q9F660       | <i>Lactobacillus johnsonii</i>           | 326           | Cluster2       | (Elkins et al., 2001)      |
| P97038       | <i>Lactobacillus johnsonii</i>           | 316           | Cluster2       | (Elkins et al., 2001)      |
| H6WSA2       | <i>Lactobacillus fermentum</i>           | 325           | Cluster5       | (Kumar et al., 2013)       |
| A0A1F0S498   | <i>Lactobacillus sp.</i> HMSC056D05      | 338           | Cluster7       | (Kaya et al., 2017)        |
| Q9KK62       | <i>Bifidobacterium longum</i>            | 317           | Cluster2       | (Kumar et al., 2006)       |
| A0A087BL81   | <i>Bifidobacterium longum</i>            | 317           | Cluster2       | (Jarocki et al., 2014)     |
| Q6R974       | <i>Bifidobacterium bifidum</i>           | 316           | Cluster2       | (Kim et al., 2004)         |
| G0YYC2       | <i>Bifidobacterium animalis</i>          | 314           | Cluster2       | (Jarocki, 2011)            |
| Q53CP8       | <i>Bifidobacterium animalis</i>          | 314           | Cluster2       | (Kim and Lee, 2008)        |
| A0A072MTF9   | <i>Bifidobacterium pseudocatenulatum</i> | 316           | Cluster2       | (Jarocki et al., 2014)     |
| P54965       | <i>Clostridium perfringens</i>           | 329           | Cluster2       | (Rossocha et al., 2005)    |
| C7CXJ5       | <i>Enterococcus faecalis</i> T2          | 324           | Cluster2       | (Chand et al., 2018)       |
| E2YQS1       | <i>Enterococcus faecalis</i> DAPTO 512   | 355           | Cluster7       | (Song et al., 2019)        |
| R6GBZ3       | <i>Eubacterium hallii</i> CAG:12         | 324           | Cluster2       | (Song et al., 2019)        |
| A0A380KNN4   | <i>Streptococcus infantarius</i>         | 325           | Cluster2       | (Song et al., 2019)        |
| D6DDI0       | <i>Bifidobacterium longum</i>            | 334           | Cluster2       | (Song et al., 2019)        |

|            |                                           |     |             |                      |
|------------|-------------------------------------------|-----|-------------|----------------------|
| A0A3A6KGT7 | <i>Bacteroides sp.</i> AF35-22            | 361 | Cluster3(S) | (Song et al., 2019)  |
| A0A3A6KI09 | <i>Bacteroides sp.</i> AF35-22            | 351 | Cluster1(S) | (Song et al., 2019)  |
| Q8A600     | <i>Bacteroides thetaiotaomicron</i>       | 352 | Cluster1(S) | (Yao et al., 2018)   |
| A0A416F798 | <i>Clostridium sp.</i> AF32-7AC           | 336 | Cluster4    | (Song et al., 2019)  |
| A7LYY3     | <i>Bacteroides ovatus</i>                 | 359 | Cluster3(S) | (Jones et al., 2008) |
| A7V5S3     | <i>Bacteroides uniformis</i>              | 361 | Cluster3(S) | (Jones et al., 2008) |
| A5ZA20     | <i>Eubacterium ventriosum</i> ATCC 27560  | 329 | Cluster2    | (Jones et al., 2008) |
| A5ZWR0     | <i>Blautia obeum</i> ATCC 29174           | 325 | Cluster2    | (Jones et al., 2008) |
| A5ZM11     | <i>Blautia obeum</i> ATCC 29174           | 326 | Cluster2    | (Jones et al., 2008) |
| A4E835     | <i>Collinsella aerofaciens</i> ATCC 25986 | 308 | Cluster2    | (Jones et al., 2008) |
| A7A5K1     | <i>Bifidobacterium adolescentis</i> L2-32 | 347 | Cluster2    | (Jones et al., 2008) |

(S): BSH with signal peptide.

### Reference:

- Bi, J., Fang, F., Lu, S., Du, G., and Chen, J. (2013). New insight into the catalytic properties of bile salt hydrolase. *J Mol Catal B-Enzym* 96, 46-51.
- Bustos, A.Y., Font, G.M., Raya, R.R., and Taranto, M.P. (2016). Genetic characterization and gene expression of bile salt hydrolase (bsh) from *Lactobacillus reuteri* CRL 1098, a probiotic strain. *Int J Genomics Proteomics Metabolomics Bioinformatics*. 1(1), 1-8.
- Chae, J.P., Valeriano, V.D., Kim, G.B., and Kang, D.K. (2013). Molecular cloning, characterization and comparison of bile salt hydrolases from *Lactobacillus johnsonii* PF01. *J Appl Microbiol* 114, 121-133.
- Chand, D., Panigrahi, P., Varshney, N., Ramasamy, S., and Suresh, C.G. (2018). Structure and function of a highly active bile salt hydrolase (BSH) from *Enterococcus faecalis* and post-translational processing of BSH enzymes. *Biochim Biophys Acta Proteins Proteom* 1866, 507-518.
- Christiaens, H., Leer, R.J., Pouwels, P.H., and Verstraete, W. (1992). Cloning and expression of a conjugated bile acid hydrolase gene from *Lactobacillus plantarum* by using a direct plate assay. *Appl Environ Microbiol* 58, 3792-3798,
- Elkins, C.A., Moser, S.A., and Savage, D.C. (2001). Genes encoding bile salt hydrolases and conjugated bile salt transporters in *Lactobacillus johnsonii* 100-100 and other *Lactobacillus* species. *Microbiology* 147, 3403-3412.
- Fang, F., Li, Y., Bumann, M., Raftis, E.J., Casey, P.G., Cooney, J.C., Walsh, M.A., and O'toole, P.W. (2009). Allelic variation of bile salt hydrolase genes in *Lactobacillus salivarius* does not determine bile resistance levels. *J Bacteriol* 191, 5743-5757.
- Gu, X.C., Luo, X.G., Wang, C.X., Ma, D.Y., Wang, Y., He, Y.Y., Li, W., Zhou, H., and Zhang, T.C. (2014). Cloning and analysis of bile salt hydrolase genes from *Lactobacillus plantarum* CGMCC No. 8198. *Biotechnol Lett* 36, 975-983.
- Jarocki, P. (2011). Molecular characterization of bile salt hydrolase from *Bifidobacterium*

- animalis* subsp. *lactis* Bi30. *J Microbiol Biotechnol* 21, 838-845.
- Jarocki, P., Podleśy, M., Glibowski, P., and Targoński, Z. (2014). A new insight into the physiological role of bile salt hydrolase among intestinal bacteria from the genus *Bifidobacterium*. *PLoS One* 9, e114379.
- Jiang, J., Hang, X., Zhang, M., Liu, X., Li, D., and Yang, H. (2010). Diversity of bile salt hydrolase activities in different lactobacilli toward human bile salts. *Ann Microbiol* 60, 81-88.
- Jones, B.V., Begley, M., Hill, C., Gahan, C.G., and Marchesi, J.R. (2008). Functional and comparative metagenomic analysis of bile salt hydrolase activity in the human gut microbiome. *Proc Natl Acad Sci U S A* 105, 13580-13585.1
- Kaya, Y., K., Kök, MŞ, and, Öztürk, M. (2017). Molecular cloning, expression and characterization of bile salt hydrolase from *Lactobacillus rhamnosus* E9 strain. *Food Biotech* 31, 128-140.
- Kim, G.-B., Miyamoto, C.M., Meighen, E.A., and Lee, B.H. (2004). Cloning and characterization of the bile salt hydrolase genes (bsh) from *Bifidobacterium bifidum* strains. *Appl Environ Microbiol* 70, 5603-5612.
- Kim, G.B., and Lee, B.H. (2008). Genetic analysis of a bile salt hydrolase in *Bifidobacterium animalis* subsp. *lactis* KL612. *J Appl Microbiol* 105, 778-790.
- Kumar, R., Rajkumar, H., Kumar, M., Varikuti, S.R., Athimamula, R., Shujauddin, M., Ramagoni, R., and Kondapalli, N. (2013). Molecular cloning, characterization and heterologous expression of bile salt hydrolase (Bsh) from *Lactobacillus fermentum* NCDO394. *Mol Biol Rep* 40, 5057-5066.
- Kumar, R.S., Brannigan, J.A., Prabhune, A.A., Pundle, A.V., Dodson, G.G., Dodson, E.J., and Suresh, C.G. (2006). Structural and functional analysis of a conjugated bile salt hydrolase from *Bifidobacterium longum* reveals an evolutionary relationship with penicillin V acylase. *J Biol Chem* 281, 32516-32525.
- Mcauliffe, O., Cano, R.J., and Klaenhammer, T.R. (2005). Genetic analysis of two bile salt hydrolase activities in *Lactobacillus acidophilus* NCFM. *Appl Environ Microbiol* 71, 4925-4929.
- Rani, R.P., Anandharaj, M., and Ravindran, A.D. (2017). Characterization of bile salt hydrolase from *Lactobacillus gasseri* FR4 and demonstration of its substrate specificity and inhibitory mechanism using molecular docking analysis. *Front Microbiol* 8, 1004.
- Ren, J., Sun, K., Wu, Z., Yao, J., and Guo, B. (2011). All 4 bile salt hydrolase proteins are responsible for the hydrolysis activity in *Lactobacillus plantarum* ST-III. *J Food Sci* 76, M622-628.
- Rossocha, M., Schultz-Heienbrok, R., Von Moeller, H., Coleman, J.P., and Saenger, W. (2005). Conjugated bile acid hydrolase is a tetrameric N-terminal thiol hydrolase with specific recognition of its cholyl but not of its tauryl product. *Biochemistry* 44, 5739-5748.
- Song, Z., Cai, Y., Lao, X., Wang, X., Lin, X., Cui, Y., Kalavagunta, P.K., Liao, J., Jin, L., Shang,

- J., and Li, J. (2019). Taxonomic profiling and populational patterns of bacterial bile salt hydrolase (BSH) genes based on worldwide human gut microbiome. *Microbiome* 7, 9.
- Wang, Z., Zeng, X., Mo, Y., Smith, K., Guo, Y., and Lin, J. (2012). Identification and characterization of a bile salt hydrolase from *Lactobacillus salivarius* for development of novel alternatives to antibiotic growth promoters. *Appl Environ Microbiol* 78, 8795-8802.
- Yao, L., Seaton, S.C., Ndousse-Fetter, S., Adhikari, A.A., Dibenedetto, N., Mina, A.I., Banks, A.S., Bry, L., and Devlin, A.S. (2018). A selective gut bacterial bile salt hydrolase alters host metabolism. *Elife* 7, e37182.

**Supplementary Table S2. Characteristics of the metagenomic datasets included in this study.**

| <b>Accession Number</b>    | <b>Health and Disease sample amounts</b>      | <b>Countries</b> | <b>Sequencing Methods</b>                                                          | <b>References</b>                           |
|----------------------------|-----------------------------------------------|------------------|------------------------------------------------------------------------------------|---------------------------------------------|
| PRJEB5224                  | healthy (109)<br>CD (39)<br>UC (64)           | Denmark, Spain   | Illumina HiSeq 2000                                                                | (Li et al., 2014)                           |
| PRJNA389280                | healthy (65)<br>CD (151)<br>UC (84)           | USA              | Illumina HiSeq 2000                                                                | (Schirmer et al., 2018)                     |
| PRJEB7774                  | healthy (63)<br>CA (47)<br>CRC (46)           | Austria          | Illumina HiSeq 2000                                                                | (Feng et al., 2015)                         |
| PRJEB6070                  | healthy (61)<br>CA (42)                       | France, Germany  | Illumina HiSeq 2000                                                                | (Zeller et al., 2014)                       |
| PRJEB12449                 | healthy (52)<br>CRC (52)                      | USA              | Illumina HiSeq 2000                                                                | (Vogtmann et al., 2016)                     |
| PRJEB10878                 | healthy (54)<br>CRC (74)                      | China            | Illumina HiSeq 2000                                                                | (Yu et al., 2017)                           |
| PRJNA389927                | healthy (28)<br>CA (28)<br>CRC (28)           | USA, Canada      | Illumina HiSeq 4000                                                                | (Hannigan et al., 2018)                     |
| PRJNA447983                | healthy (28)<br>CRC (32)                      | Italy            | Illumina HiSeq 2500                                                                | (Thomas et al., 2019)                       |
| PRJEB27928                 | healthy (60)<br>CRC (22)                      | Germany          | Illumina HiSeq 2000<br>Illumina HiSeq 4000                                         | (Wirbel et al., 2019)                       |
| PRJEB4336                  | healthy (123)<br>OB (169)                     | Denmark          | Illumina Genome Analyzer II<br>Illumina Genome Analyzer Iix<br>Illumina HiSeq 2000 | (Le Chatelier et al., 2013)                 |
| PRJNA422434                | healthy (183)<br>T2D (187)                    | China            | Illumina Genome Analyzer II                                                        | (Qin et al., 2012)                          |
| PRJNA354235<br>PRJNA373901 | healthy (308)<br>m-NAFLD (74)<br>a-NAFLD (12) | USA              | Illumina HiSeq 2500                                                                | (Loomba et al., 2017; Abu-Ali et al., 2018) |
| PRJEB6337                  | healthy (114)<br>LC (123)                     | China            | Illumina HiSeq 2000                                                                | (Qin et al., 2014)                          |

|                           |                                     |                 |                                                                                      |                          |
|---------------------------|-------------------------------------|-----------------|--------------------------------------------------------------------------------------|--------------------------|
| PRJEB21528                | healthy (171)<br>CVD (214)          | China           | Illumina HiSeq 2000                                                                  | (Jie et al., 2017)       |
| PRJEB17784                | healthy (28)<br>PD (31)             | Germany         | Illumina HiSeq 4000                                                                  | (Bedarf et al., 2017)    |
| PRJEB28847                | healthy (22)<br>epilepsy (24)       | Sweden          | Illumina MiSeq V3 chemistry                                                          | (Lindfeldt et al., 2019) |
| PRJNA453965               | healthy (71)<br>BC (62)             | China           | Illumina HiSeq X Ten                                                                 | (Zhu et al., 2018)       |
| <b>Validation cohorts</b> |                                     |                 |                                                                                      |                          |
| PRJEB1220                 | healthy (236)<br>CD (13)<br>UC (69) | Denmark, Spain  | Illumina Genome Analyzer II,<br>Illumina Genome Analyzer IIX,<br>Illumina HiSeq 2000 | (Nielsen et al., 2014)   |
| PRJEB6070                 | healthy (61)<br>CRC (91)            | France, Germany | Illumina HiSeq 2000                                                                  | (Zeller et al., 2014)    |

The sample numbers used in the analysis are shown after the cases. Abbreviations: UC: ulcerative colitis, CD: Crohn's disease, CA: colorectal adenomas, CRC: colorectal cancer, OB: obesity, T2D: Type 2 diabetes, NAFLD: non-alcoholic fatty liver disease, LC: liver cirrhosis, CVD: cardiovascular disease, PD: Parkinson's disease, BC: Breast cancer.

### Reference:

- Abu-Ali, G.S., Mehta, R.S., Lloyd-Price, J., Mallick, H., Branck, T., Ivey, K.L., Drew, D.A., Dulong, C., et al. (2018). Metatranscriptome of human faecal microbial communities in a cohort of adult men. *Nat Microbiol* 3, 356-366.
- Bedarf, J.R., Hildebrand, F., Coelho, L.P., Sunagawa, S., Bahram, M., Goeser, F., Bork, P., and Wüllner, U. (2017). Functional implications of microbial and viral gut metagenome changes in early stage L-DOPA-naïve Parkinson's disease patients. *Genome Med* 9, 39.
- Feng, Q., Liang, S., Jia, H., Stadlmayr, A., Tang, L., Lan, Z., Zhang, D., Xia, H., et al. (2015). Gut microbiome development along the colorectal adenoma–carcinoma sequence. *Nat Commun* 6, 6528.
- Hannigan, G.D., Duhaime, M.B., Ruffin, M.T., Koumpouras, C.C., and Schloss, P.D. (2018). Diagnostic potential and interactive dynamics of the colorectal cancer virome. *mBio* 9, e02248-02218.
- Jie, Z., Xia, H., Zhong, S.-L., Feng, Q., Li, S., Liang, S., Zhong, H., Liu, Z., et al. (2017). The gut microbiome in atherosclerotic cardiovascular disease. *Nat Commun* 8, 845.
- Le Chatelier, E., Nielsen, T., Qin, J., Prifti, E., Hildebrand, F., Falony, G., Almeida, M., Arumugam, et al. (2013). Richness of human gut microbiome correlates with metabolic markers. *Nature* 500, 541-546.

- Li, J., Jia, H., Cai, X., Zhong, H., Feng, Q., Sunagawa, S., Arumugam, M., Kultima, J.R., et al. (2014). An integrated catalog of reference genes in the human gut microbiome. *Nat Biotech* 32, 834-841.
- Lindfeldt, M., Eng, A., Darban, H., Bjerkner, A., Zetterström, C.K., Allander, T., Andersson, B., Borenstein, E., Dahlin, M., and Prast-Nielsen, S. (2019). The ketogenic diet influences taxonomic and functional composition of the gut microbiota in children with severe epilepsy. *NPJ Biofilms Microbiomes* 5, 5.
- Loomba, R., Seguritan, V., Li, W., Long, T., Klitgord, N., Bhatt, A., Dulai, P.S., Caussy, C., et al. (2017). Gut microbiome-based metagenomic signature for non-invasive detection of advanced fibrosis in human nonalcoholic fatty liver disease. *Cell Metab* 25, 1054-1062.
- Nielsen, H.B., Almeida, M., Juncker, A.S., Rasmussen, S., Li, J., Sunagawa, S., Plichta, D.R., Gautier, L., et al. (2014). Identification and assembly of genomes and genetic elements in complex metagenomic samples without using reference genomes. *Nat Biotech* 32, 822-828.
- Qin, J., Li, Y., Cai, Z., Li, S., Zhu, J., Zhang, F., Liang, S., Zhang, W., et al. (2012). A metagenome-wide association study of gut microbiota in type 2 diabetes. *Nature* 490, 55-60.
- Qin, N., Yang, F., Li, A., Prifti, E., Chen, Y., Shao, L., Guo, J., Le Chatelier, E., Yao, J., Wu, L., Zhou, J., Ni, S., Liu, L., Pons, N., Batto, J.M., Kennedy, S.P., Leonard, P., Yuan, et al. (2014). Alterations of the human gut microbiome in liver cirrhosis. *Nature* 513, 59-64.
- Schirmer, M., Franzosa, E.A., Lloyd-Price, J., Mciver, L.J., Schwager, R., Poon, T.W., Ananthakrishnan, A.N., Andrews, E., et al. (2019). Metagenomic analysis of colorectal cancer datasets identifies cross-cohort microbial diagnostic signatures and a link with choline degradation. *Nat Med* 25, 667-678.
- Vogtmann, E., Hua, X., Zeller, G., Sunagawa, S., Voigt, A.Y., Hercog, R., Goedert, J.J., Shi, J., Bork, et al. (2016). Colorectal cancer and the human gut microbiome: reproducibility with whole-genome shotgun sequencing. *PLoS One* 11, e0155362.
- Wirbel, J., Pyl, P.T., Kartal, E., Zych, K., Kashani, A., Milanese, A., Fleck, J.S., Voigt, A.Y., et al. (2019). Meta-analysis of fecal metagenomes reveals global microbial signatures that are specific for colorectal cancer. *Nat Med* 25, 679-689.
- Yu, J., Feng, Q., Wong, S.H., Zhang, D., Liang, Q.Y., Qin, Y., Tang, L., Zhao, H., et al. (2017). Metagenomic analysis of faecal microbiome as a tool towards targeted non-invasive biomarkers for colorectal cancer. *Gut* 66, 70-78.
- Zeller, G., Tap, J., Voigt, A.Y., Sunagawa, S., Kultima, J.R., Costea, P.I., Amiot, A., Böhm, J., Brunetti, F., Habermann, N., et al. (2014). Potential of fecal microbiota for early-stage detection of colorectal cancer. *Mol Syst Biol* 10, 766.
- Zhu, J., Liao, M., Yao, Z., Liang, W., Li, Q., Liu, J., Yang, H., Ji, Y., et al. (2018). Breast cancer in postmenopausal women is associated with an altered gut metagenome. *Microbiome* 6, 136.



## Supplementary Figure S1.

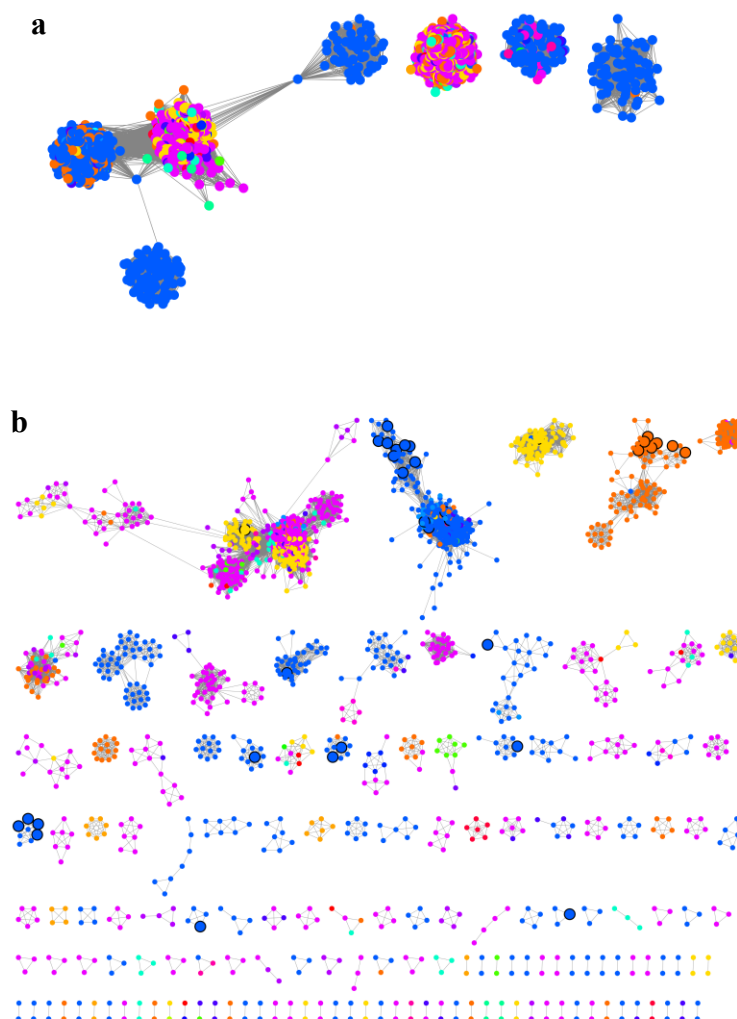

**Supplementary Figure S1. Protein sequence similarity network (SSN) of bile salt hydrolases (BSHs).** The proteins listed in Table S1 were used as queries to BLAST against the UniProt database with the parameters described in the “Methods.” The queries and BLAST results (5,790 proteins in total) were used to generate the network using an e-value threshold of  $10^{-40}$  (>30% sequence identity, (a)) or an e-value threshold of  $10^{-75}$  (>50% sequence identity, (b)). The network displayed 2,396 nodes representing 5,790 proteins filtered at 90% sequence identity. Each cluster was sequentially ranked and labeled based on node number. In B, the enzymes listed Supplementary Table 1 is enlarged. Nodes from the same phylum in the network have the same color, which is shown in figure 1.

## Supplementary Figure S2.

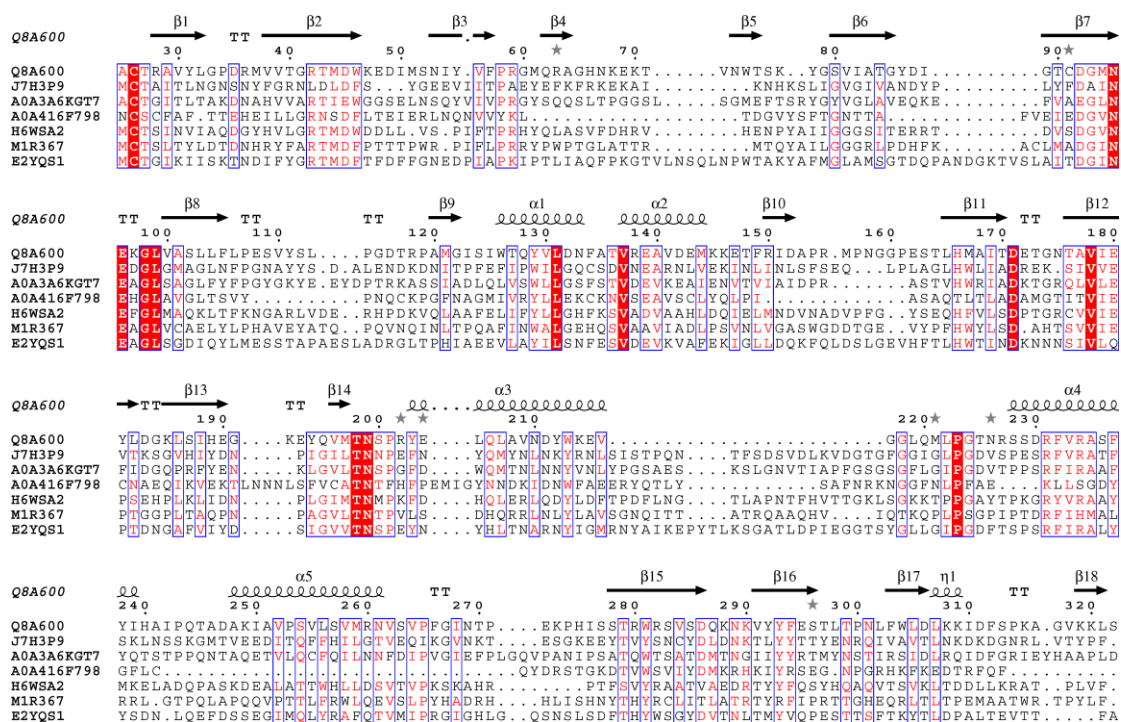

**Supplementary Figure S2.** Sequence alignment of representative sequences from Clusters 1–7. The UniProt IDs of the 7 enzymes from Clusters 1–7 are listed on the left. The secondary structure was predicted based on the enzyme from *Bacteroides thetaiotaomicron* VPI (UniProt ID: Q8A600; PDB ID: 3HBC). Identical and similar amino acids are shown in red boxes.

**Supplementary Figure S3.**

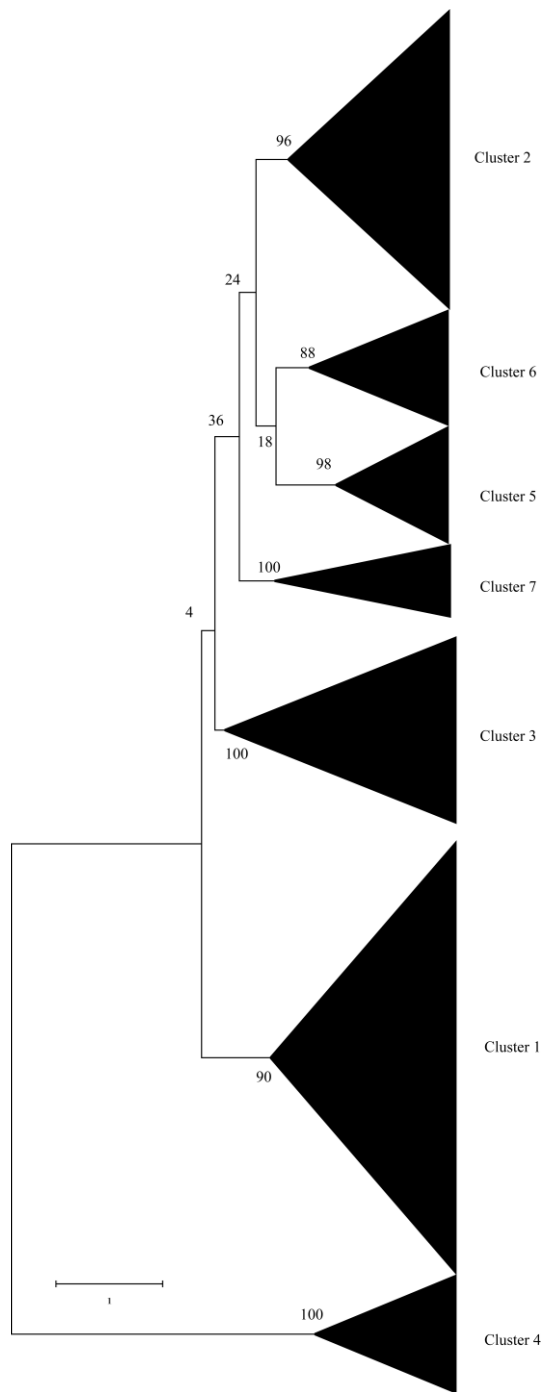

**Supplementary Figure S3.** Evolutionary relationships of bile salt hydrolases (BSHs) in the 7 clusters. Maximum-likelihood phylogenetic tree for the BSHs listed in the Supplementary dataset were generated using MEGA X. The percentage of replicate trees in the bootstrap test (500 replicates) is shown next to the branches.

**Supplementary Figure S4.**

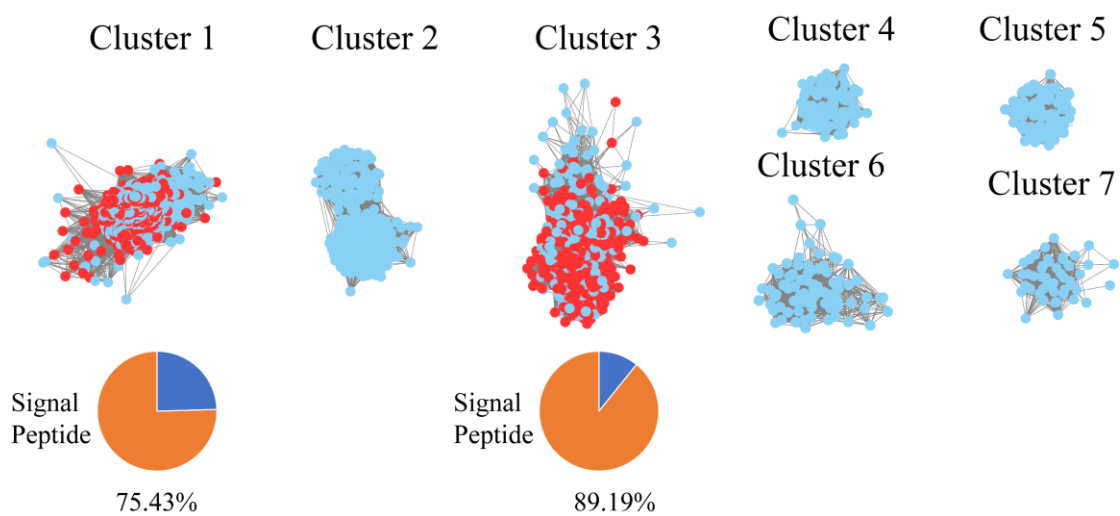

**Supplementary Figure S4.** Protein sequence similarity network (SSN) of bile salt hydrolases (BSHs) annotated by signal peptides. The network was built as shown in Figure 1. The proteins with signal peptides are shown in red. The protein percentages with signal peptides in the clusters are listed at the bottom.

### Supplementary Figure S5.

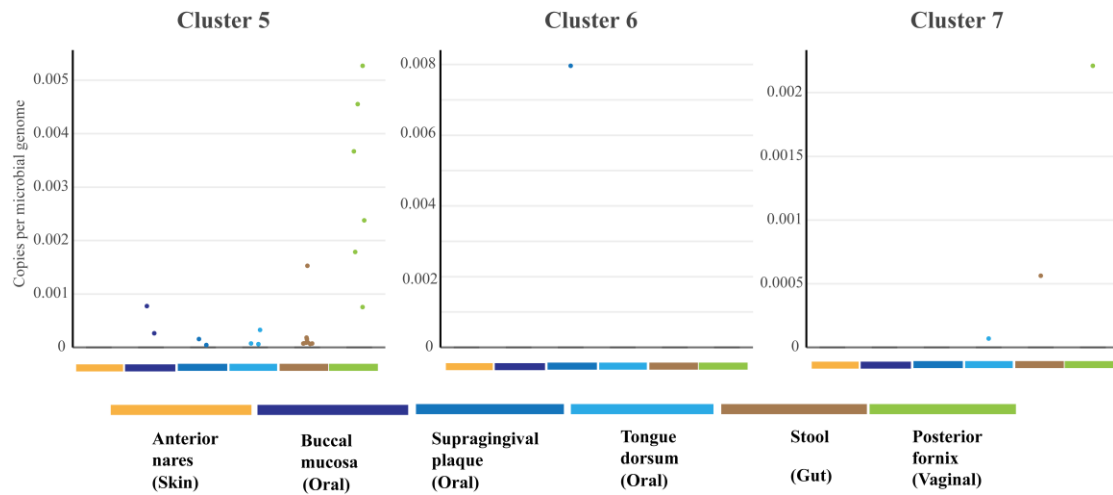

**Supplementary Figure S5.** Boxplots of the abundances of Clusters 1–4 across six body sites. Tukey boxplots in the main text show the median, first quartile ( $Q_1$ ), and third quartile ( $Q_3$ ). Whiskers are extended to include data points between  $Q_1-1.5$  ( $Q_3-Q_1$ ) and  $Q_1$  and between  $Q_3$  and  $Q_1+1.5$  ( $Q_3-Q_1$ ) (the lower and upper inner fences, respectively). Values outside of this range are individually marked with dots.

## Supplementary Figure S6.

### Cluster 1

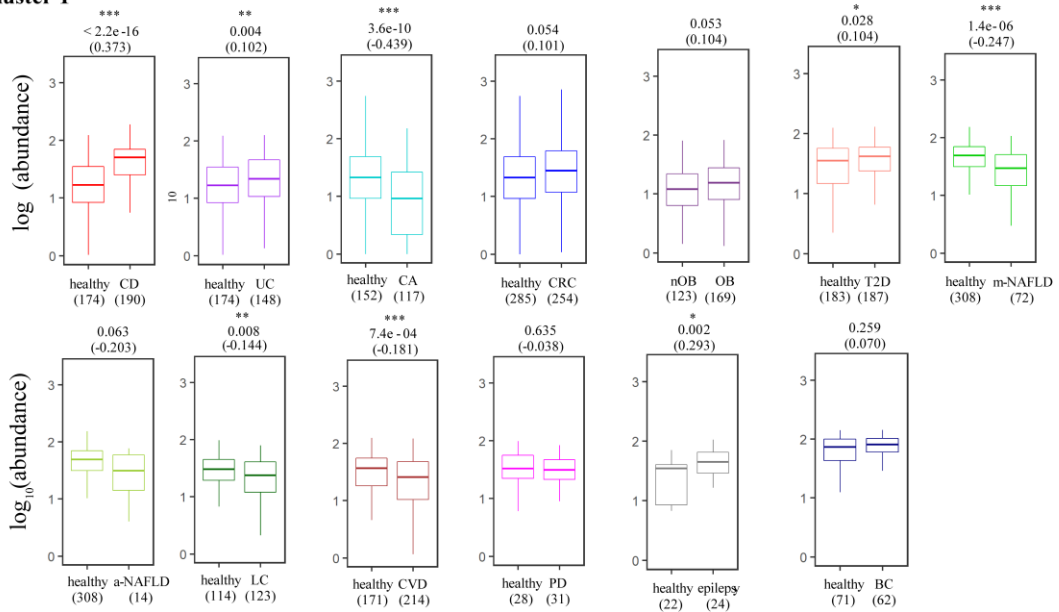

### Cluster 2

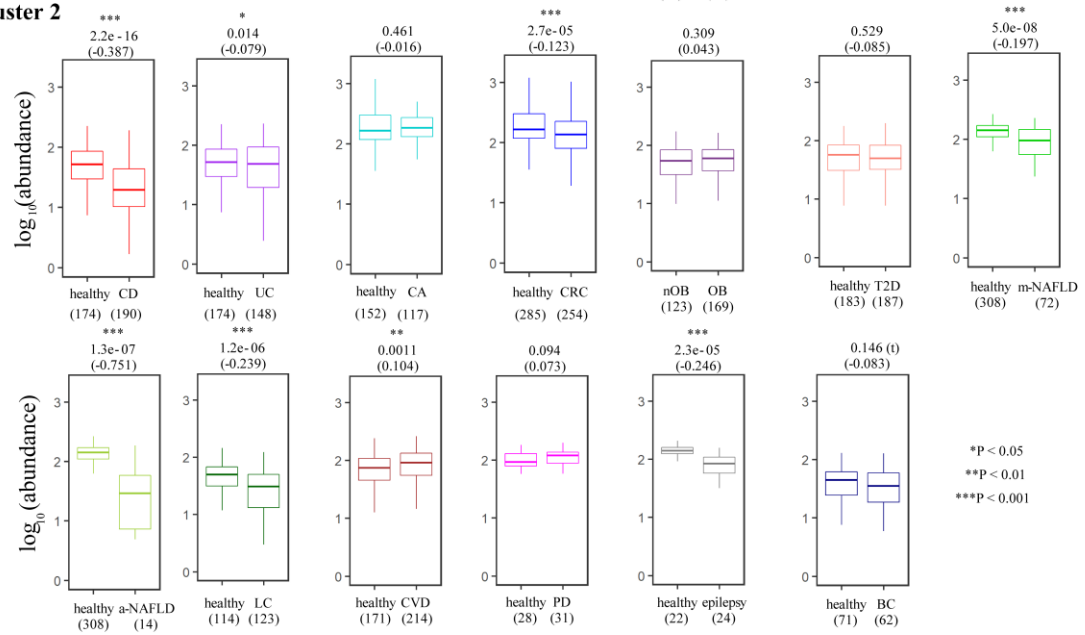

\*P < 0.05  
 \*\*P < 0.01  
 \*\*\*P < 0.001

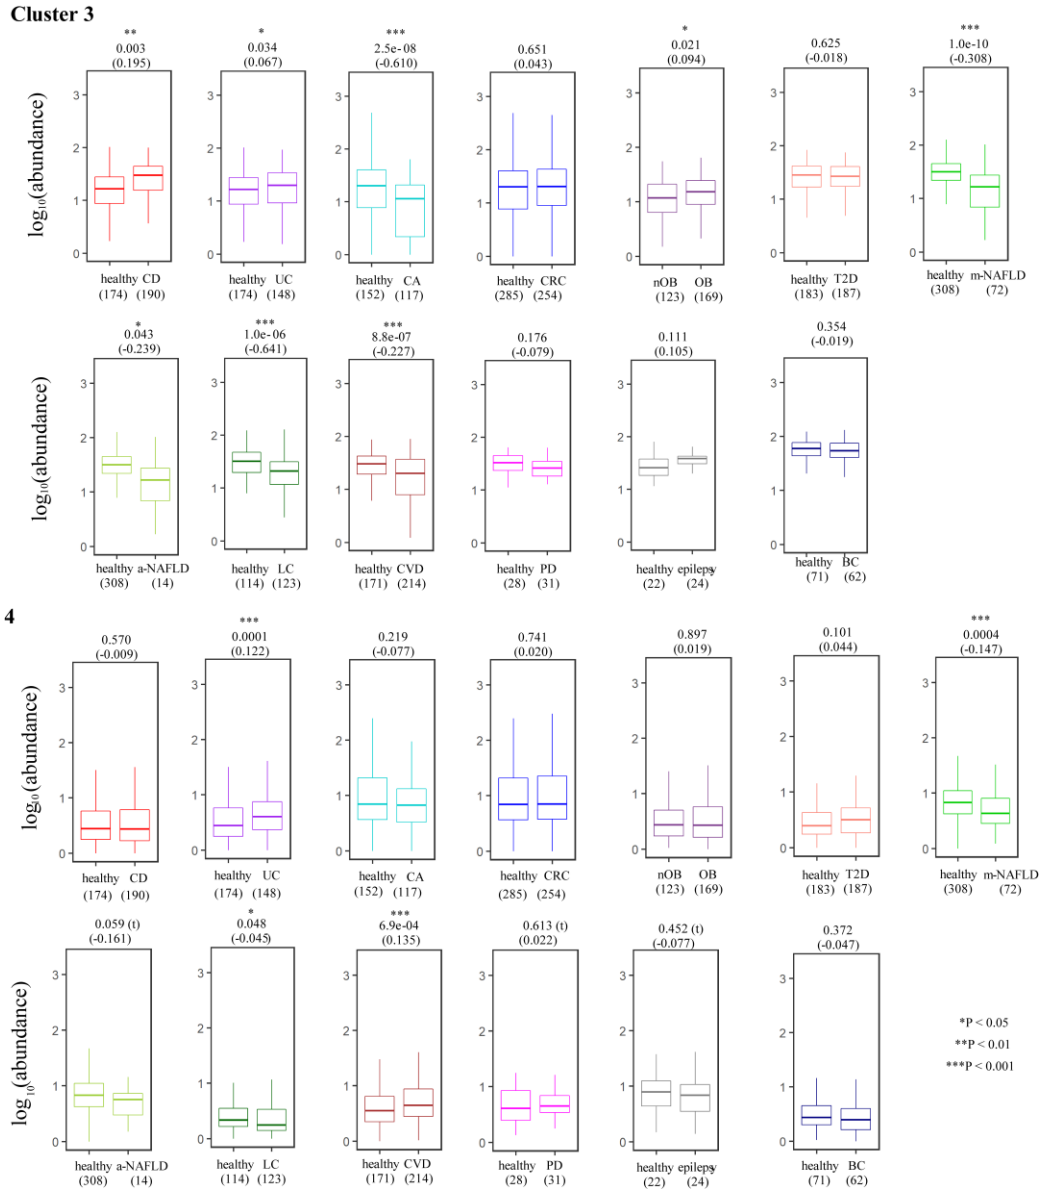

**Supplementary Figure S6.** Abundance of BSH genes in metagenomic data from controls and individuals with diseases. The sample number of controls and diseases are shown below the box plot. The abbreviations of the diseases are: UC: ulcerative colitis, CD: Crohn's disease, CA: colorectal adenomas, CRC: colorectal cancer, NAFLD: non-alcoholic fatty liver disease, LC: liver cirrhosis, CVD: cardiovascular disease, PD: Parkinson's disease, T2D: Type 2 diabetes, OB: obesity, BC: Breast cancer. The number above the plot shows the generalized fold change. The number above the generalized fold change showed the significant value, which is determined using which is determined using two-sample Wilcoxon rank sum test or two-sample Student's t-test (shown as t after the significant value) as described in Methods.  $*p < 0.05$ ,  $**p < 0.01$ ,  $***p < 0.001$  compared with control.

## Supplementary Figure S7

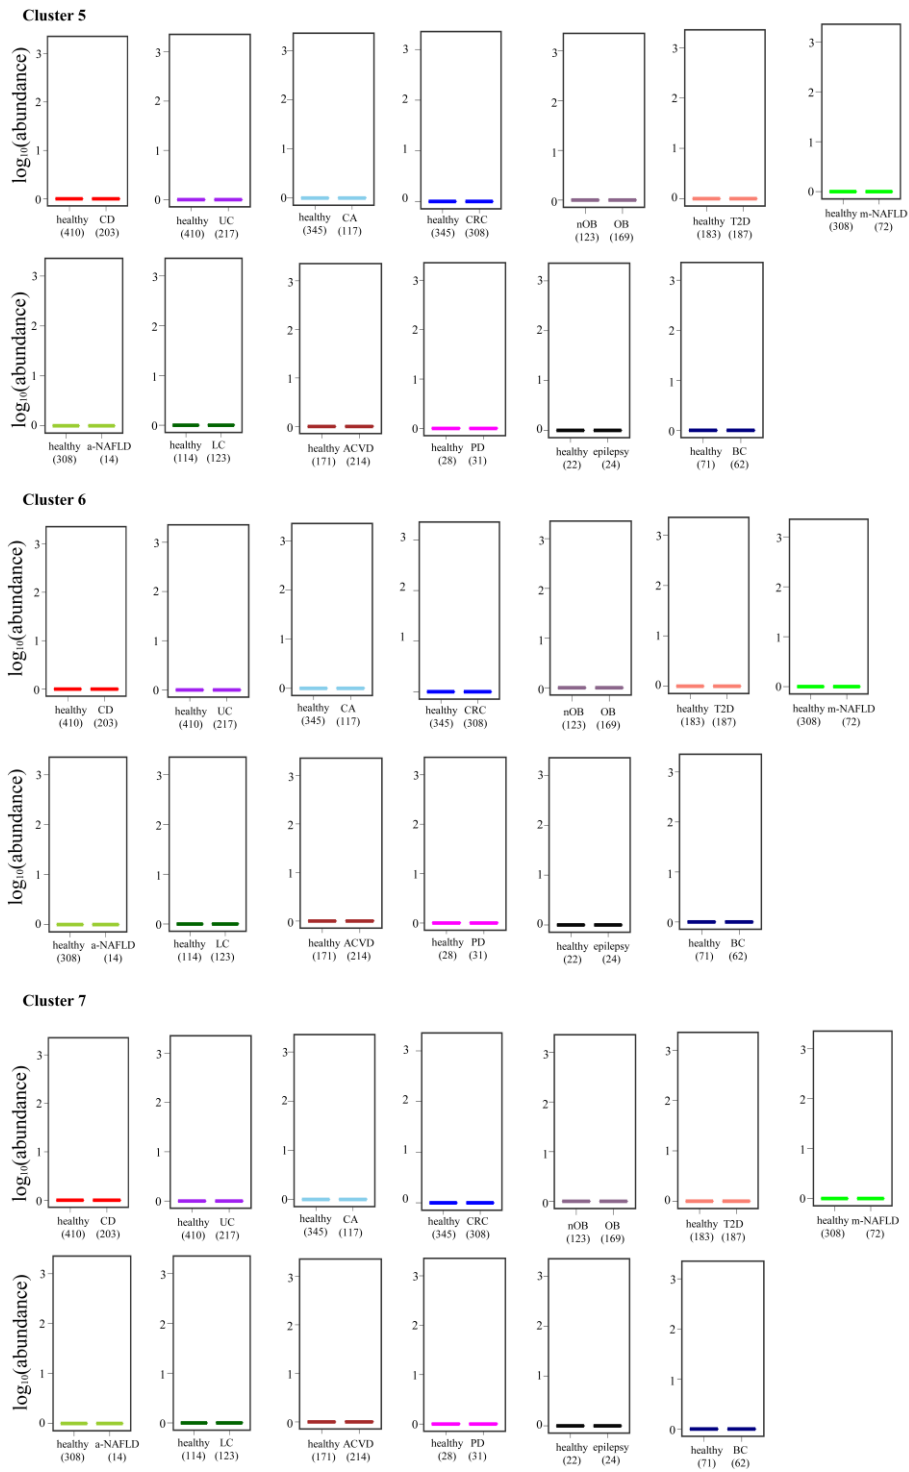

**Supplementary Figure S7.** Abundance of BSH genes in Cluster 2-7 in metagenomic data from controls and individuals with diseases. The sample number of controls and diseases are shown below the box plot. The abbreviations of the diseases are: UC: ulcerative colitis, CD: Crohn's disease, CA: colorectal adenomas, CRC: colorectal cancer, NAFLD: non-alcoholic fatty liver disease, LC: liver cirrhosis, CVD: cardiovascular disease, PD: Parkinson's disease, T2D: Type 2 diabetes, OB: obesity, BC: Breast cancer. The number above the plot shows the generalized fold change.



## Supplementary Dataset S1: Uniprot ID of protein sequences used to generate sequence similarity network.

Uniprot ID in Cluster 1:

A0A090RVN9, A0A090T8A2, A0A0D6IZV1, A0A0K0X5Q5, A0A1Q4TMD2, A0A2M9F526, A0A2U9PX33, A0R3F5, I7GE63, A0A0E4H166, A0A2K4YG25, A0A0N0NJ73, A0A0T1W447, A0A1V4Q388, A0A132PT97, A0A1X2FE06, A0A150ACB7, A0A1B1FYG0, A0A150ACC0, A0A1A2Z3Q4, A0A1P8XDL7, A0A2N7FGT5, A0A439DPW9, E4N7A8, A0A085ET19, A0A1B1WLE5, A0A378TKL5, A0A378WAP6, A0A143HQ04, A0A111NWM5, A0A1A0Y5U1, A0A1Q9ED01, A0A1G4WUY2, A0A1Z4QPU6, A0A2U0HCH5, A0A1H7FD17, A0A1X0HM02, A0A3C1P3D6, A0A317FK41, A0A1X0JPK2, A0A3N6QD50, A7IH78, A0A239EGN9, A0A258MZR0, A0A2P5MDS2, A0A3N5F571, A0A3E0WQ70, A0A352HR18, A0A3L7A942, F6EQU4, G8RNV6, W4ADQ7, A0A064CE66, A0A1J0UFJ8, A0A1X0IMN5, A0A2N8LLR0, A0A378RDV1, A0A098BT86, A0A162URI7, A0A1H3KX76, A0A1I2FQA2, A0A1Y5P370, A0A2T5VUK9, A0A2U2AHK4, A0A255DIG5, A0A037UUD0, E3I4E4, G4HUE5, A0A351WEA6, R8Y3X4, A0A072P6W9, A0A2W7NH10, A0A3N6ZBT6, A0A2N3GF60, A0A0P0JI59, A0A0W8JH92, A0A1R4HXE3, A0A256CN69, A0A2U2AK97, A0A2U2AQ10, A0A0W1AKM8, B6XKA7, A0A3S0E068, A0A1L9QP00, A0A0T9UPL1, A0A1G7YJV7, A0A1I3IQI2, Q6E7I9, A0A1D9G6X6, N1MEY0, A0A072PT27, A0A059MP64, A0A0N0S0W9, A0A1V3ZLE5, A0A2I6L377, A0A399YA86, M2Z7F8, A0A078T3S9, A0A3A3ZYJ0, A0A2K8QIQ5, A0A3A5A024, A8HQ68, A0A0F3MSV0, Q4UKE3, A0A0M1JU96, H0JYR8, L8AGI8, P72765, A0A093S9J0, A0A0M2F1R0, A0A1M5TJY7, A0A330JEV8, A0A19AED3, A0A433NEA5, A0A0H3I0S1, A0A1D7YWQ5, A0A221T775, A0A2T3VTV2, Q6D291, A0A0J6AJ70, C6DBF1, A0A1R4LSL0, A0A291HV55, A9C2F9, A0A334A9G6, A0A0B2STC1, A0A1G0YCU2, A0A433NS89, A0A078PS99, A0A1H2RMA2, A7M5B4, D7K724, R6VC33, W6PB51, A0A031I5K2, A0A080NHC3, A0A286J2P6, A0A0C6PDX0, A0A0H3M1A1, A0A0T7QMH9, K0ML80, A0A100HPJ4, A0A139KZW9, A0A0Q5SPDK4, A0A0Q6DTH8, A0A0W7W6L3, A0A1T5L5B7, A0A1Y6F998, A0A3G8VMS2, A0A3N5QC92, A0A3N5QHP0, A0A2S5W1F1, A0A3C1DQN6, A0A3Q9IZ74, D1P475, D4XQ37, N9F6W9, W0Z7U6, A0A0D6PK57, A0A0X3TBY0, A0A2E1G5U6, A0A1Y6E5V5, A0A256G1D5, A0A2S0KJC9, A0A2Z5GAX1, A0A3E0VMC3, A0A3E0VRM6, A0A3E0W342, A0A3L7AQX3, R7ZTT8, M7AB91, A0A0Q4FEW1, A0A2S5VIA8, A0A0S9E002, A0A0S9PH31, A0A1T4WYI6, A0A160PC28, C5B214, C7CHB7, A0A2E8KJ03, A0A1M7CUE1, A0A2S1BCT8, A0A2V1HPB8, A0A3E0WAZ2, C8XA77, A0A401N0B9, M0LW53, L7L898, W0JW11, A0A0M2DR62, A0A117DVA0, X8F8A7, C2G5A0, A0A139VN02, A0A3S4UC33, A0A157R7D0, A0A3P6MJ65, A0A285UF05, A0A1A0J6B1, A0A1A2CFS1, A0A2S5ZZ59, A0A2T2ZPQ4, A0A3R2XM86, A0A1B8H484, A0A1B8HNE2, A0A1V6HC47, A0A143HRR1, A0A328XZV1, A0A354EYU7, A0A0Q6ASK3, H5TZ25, A0A1E3W8K1, A0A1R3FKE4, A0A2N7IWE5, A0A2U3PBK8, A0A1G9ZID9, A0A1I4IQG9, A0A1K1ME40, A0A1Q4CF46, A0A2G4GW44, A0A2N1QT38, A0A370G2F1, A0A438N6M1, F1YJ25, A0A158M5Z8, A0A191UFH4, A0A257ZKE3, A0A258K4F3, A0A258M554, A0A2S8RR4, A0A3L7P7E6, A3WV16, A0A090D1U5, A0A1G6CQM8, A0A1H5NS20, A0A212LBP6, A0A231NZJ6, A0A2A2Q6Y0, A0A345WAS6, A0A411JA54, A0A093RIH3, A0A0P4UVB1, A0A1A0L6F3, A0A1A0XU32, A0A2P5NNV8, A0A2U9SLC3, A0A2V0NTK0, A0A2V4BRA8, G8MN72, A0A0C5JYC8, A0A1F3ABW5, A0A1J5MWM2, A0A259UUM1, A0A3D3BI59, A0A3N6STX1, A0A3S0STV1, C3X4U8, C3XB10, W5TDL2, A0A0T7ML55, A0A0U5JCS7, A0A1H2HCC4, A0A1I3YSS2, A0A1W7A2E6, A0A282R23, A0A2E3PW26, A0A2G3PAI0, K9ZAH5, A0A2S5TYS4, A0A385HQI6, M4V9K3, A0A0D6AK66, A0A0P0LK75, D4V4K2, ESUX05, A0A0P0RH44, A0A142YZ93, A0A2T3YGQ9, A0A1A5XLL1, A0A1E2S0C5, A0A1M4UMD1, A0A259MW15, A0A2S9BQJ4, A0A3Q9JEZ4, A0A386DYR7, W5X843, A0A0D6JF60, A0A0F6A540, A0A167CV21, A0A167NFZ2, A0A0W0ZUF5, A0A161P1F8, A0A3M8NTT7, W0E2M1, A0A1E3LK57, A0A1T5FBA1, A0A2W5R0Y9, A0A372JYB6, A0A378JVQ9, A0A3S0VWQ1, A0A3C1Y5G8, A0A3R7I4I9, G9ENK1, Q0IB35, Q4KCA8, A0A038GUW9, A0A060PDH2, A0A0L0MGY3, A0A149PVJ4, A0A157ZEZ8, A0A157ZHB6, A0A157ZJF0, A0A157ZKR9, A0A157ZR90, A0A158ABW0, A0A158BAH0, A0A158BGV9, A0A158FV12, A0A158G1T5, A0A158H2M9, A0A158HCB1, A0A1P9YAZ0, A0A2U3I0M2, K8RIP1, R4WZZ1, A0A0D2DQB4, A0A0J6IMX3, A0A0U5JA52, A0A1E5QX77, A0A2K8WFMF1, A0A1T4VVU7, A0A1Z1SSJ9, A0A383KD14, B4F1C8, A0A1Z9EWU3, A0A2E3XS62, A0A355AIN2, A0A248VX20, A0A257XDW9, A0A258IEF0, A0A258T373, A0A259A4P1, A0A259L4W4, A0A292C8R7, A0A2J9L8Q3, A0A422UP34, C0AWL6, A0A2E6XYU4, A0A327XL99, A0A3D2BJF0, A0A410X6K2, A0A423EFC3, R5B6T8, A0A023NT56, A0A328PB34, A0A078LBM2, A0A1M3BAZ9, A0A0G4Q5D2, A0A0G4Q9J3, A0A1D3DHY4, A0A379FB93, V6MJF4, A0A0G9HSZ2, A0A3M0FED9, A0A140D970, A0A146GD86, A0A198GCJ4, A0A1I6H9D6, W0DWL2, A0A1M3D6W5, A0A2T6D783, A0A2C9EMC9, A0A318DIK3, A0A363RN47, A0A366DPG3, A0A380BMK7, D7VKI2, A0A3L7A714, A0A3L7AIJ3, A0A419YY41, Q07KQ0, A0A0A5SNI4, A0A0D8LA85, A0A1B8GZ97, A0A1B8H7L4, A0A1B8HD92, A0A1K3G2V6, A0A1M7EJN1, A0A2T4HZK1, A0A2X1T8K1, A0A333FG63, A0A3D3HPD0, A0A3R0G8B7, A0A422UCV9, A0A433ZSQ2, A0A447J0J4, J7U4Z5, M7CDL1, A0A0B2BMN1, A0A124QF16, A0A1B4LHH4, A0A1B4P2E4, A0A1E3FS42, A0A1J9NFJ2, A0A228NYT8, A0A2S9NNN7, A0A3N8QAT8, A0A3N8QZH7, A0A3P0S3B9, A0A0B3T225, A0A0G4JJ43, A0A0H2QTC6, A0A0N0ZAT3, A0A0T2KYS1, A0A124PYA2, A0A132DKL4, A0A132E3J2, A0A1B4LM95, A0A1G5M5S7, A0A226TC66, A4JNX7, A0A140NGT1, A0A1S1HTC0, A0A335E3Y0, A0A379GK63, B2Q2E0, K8XG31, A0A192A5P1, A0A1B7JKA3, A0A356D2Q9, A0A1B8SPQ3, A0A1J0E9Z9, A0A264VV21, A0A345M2H3, A0A379FP28, A0A3N1ZN43, A0A3R8XED7, D4C0I8, A0A1IIEUW9, A0A1M5LNV5, A0A1M6ELC9, A0A1Q5VAA4, A0A370S171, A0A405D5T0, A0A448T3N1, A0A221AG75, A0A329BTT3, A0A231MTX5, A0A239SLA2, A0A378YYW5, A0A256C8L1, A0A256CK32, L8XZS5, A0A261VVB7, A0A291IEBP3, A0A379G5T6, W3YH42, X6QF39, A0A25SUKP8, A0A25SXX024, A0A2S5V2Z6, A0A2S5WRR2, A0A358CRQ8, A0A366FRU8, B2T937, K8WEU9, A0A0E3YDZ2, A0A0E4CBC9, A0A0H3AFM0, A0A0H3Q2B4, A0A0H6I620, A0A0K9UW72, A0A0X1L0M6, A0A2K2UH00, A0A3M8K1M7, C2HZS3, C3LWE1, D7HBW7, Q9KL70, A0A0Q4X7Q2, A0A1S1P9L9, A0A1W6RDA6, A0A2N9ALV1, A0A2U8VSW2, A9VXM2, B7KZZ2, H1KFV7, A0A0Q8NRY7, A0A0S3U0C0, A0A0T6XMZ9, A0A0T6XY36, A0A1H0A8W8, A0A226CID5, A0A2V4X9Y6, A0A1H1JBC9, A0A1Q4F2T6, A0A1V0BIC5, A0A1V3TRV8, A0A228JSX6, A0A2S5E3S6, A0A290XK15, A0A2A3JYZ0, A0A2P7EB39, A0A2U8HYH7, D0KWD7, K9XB62, A0A060B824, A0A076PJ73, A0A096F1I2,

A0A0L7N2Q4, B7WU5, A0A096BW03, A0A0E3CHC4, A0A0M2L581, A0A176U0W5, A0A1Y1J2E2, A0A370EZ53, DOJ681, A0A0A2N091, A0A2U2BNR6, A0A3D0L6N4, A0A3G2HW00, A0A3R9AVL8, U7UBS9, A0A0B4XT23, A0A0B6FTT5, A0A0H3NRG9, A0A0H5G2A2, A0A0H5LXP1, A0A0N7FGI0, A0A0T9L4Y4, A0A0T9LY42, A0A0T9PXW3, A0A0T9Q0W7, A0A0T9QCV0, A0A0T9T737, A0A208ZPL2, A0A2R4NMT5, A0A2R9R8H3, A0A3S4IYN4, F4MU77, A0A0D2B108, A0A0D2C0H4, A0A0K1XC16, A0A0N0LWG2, A0A0N1CBS7, A0A0T2QFD1, A0A0U0IHQI3, A0A0W0TXE7, A0A140KCU1, K9XTS0, A0A1C7LLJ7, A0A1D8IVD3, A0A1H3SYU8, A0A210W9A3, A0A291JGZ4, A0A2G7TB21, A0A2M9PS37, A0A2W5GHI3, A0A354UEK8, F6AW21, S2WLV4, S2WQ51, A0A111BIP7, A0A1Q3NUX1, A0A1Y1PXX0, A0A376BHUI, A0A209B0V9, A0A2A7UUW8, A0A2G2PLR2, A0A3D9IEB9, A0A2G6ZPH5, A0A2K8UC95, A0A2K8W2Z9, A0A2N8QE5, A0A2T1AM28, A0A367WAC9, A0A372NI63, A0A379MP36, A0A3R5LR78, A0A410VUL5, A0A411SX43, J0B711, A0A418VDZ9, A0A420BL67, Q21114, Q2KVV2, Q7NNP2, R5D8A4, S3HYV5, A0A074M346, A0A078KZX6, A0A085H154, A0A097R7J6, A0A1B7KIB2, A0A1C6YVF0, A0A2J9GXG4, A0A377P989, A0A377PRN8, A0A095V778, E3HUP3, A0A0B1PYZ5, A0A1M6LHH0, A0A0D2BR16, A0A0M7D024, A0A2T5CSU5, A0A424W5U3, A0A448K1D4, A0A0P7Z7J9, A0A0Q6RQK3, A0A0T9KPI6, A0A127CI80, A0A2D8K553, A0A2E1BD66, A0A127ES01, A0A150WQ38, A0A154L299, A0A1X4MW45, A0A2E2SWP2, A0A158GCE4, A0A329DIS6, A0A171KQ94, A0A1B1UKQ9, A0A1D3JY86, A0A2T6LRQ2, A0A2V4YR67, A0A3E0G2U1, A0A1E4LN81, A0A1Q3SCA3, A0A1M7BWT8, A0A1N6QJW2, A0A1V2F4N3, A0A291U4L2, A0A2R4TUH3, A0A347A711, A0A3Q8DQ37, A0A3T0ZZF2, A0A454GLY3, A0KIW5, A0A1U710A4, A0A254QAE4, A0A2I8D1Q2, A0A2I8R338, A0A2L0TWG3, A0A2X4NQR6, A0A369T4E6, A0A3G9I3T7, A0A3S5XBT9, A0A3S5XC08, A0A3S5Z963, A0A443XJP4, A0A2M8WAH3, A0A2W1KGL0, B7J975, E6QET7, A0A3N1VYV5, A0A3N7ALY2, A0A3S4IS17, A0A410VH29, A0A42IDL5, B2IEE6, D8KC15, K2P909, K9RT22, Q6FAR4, R7WZJ3, A0A011TVG2, A0A137XR21, A0A1J6HS29, A0A256H0F6, A0A2S7IYE2, A0A2S8U660, A0A317LBJ1, A0A3N0B8X6, A0A427JY6, A6WZL1, A0A024J0I0, A0A083ZJN8, A0A0X8IVN1, A0A176XK71, A0A1B9UEX2, A0A1G5FTR2, A0A1G8Y2U8, A0A1S7NB23, A0A1S7NB44, A0A1S7QI05, A0A1S7R4A2, A0A1S7RMH8, A0A1S7RYQ8, A0A1S7T534, A0A1S7U6T6, A0A1S9EEK2, A0A1S9EKM8, A0A2K0ZTR2, A0A328F343, A0A3B8F6X6, A0A3D5ILT5, A0A3G2CYC6, A0A3G2DCA0, A0A3G2DSE3, A9CGU9, F0LB55, F5JJS4, F7UBR4, H0HC18, K5D7B2, U4QCS6, A0A063U2F3, A0A0E8G315, A0A0N2IJW2, A0A0T7CRD8, A0A171JUX0, A0A1M9DSL4, A0A261W6K4, A0A3T0P2I3, Q7VSF3, Q7W5H2, A0A098G0W1, A0A0C1IJJ9, A0A0D2BNT2, A0A0H4W7S1, A0A3S4TR09, A0A0M6Y826, A0NZW1, U7FRP0, A0A0Q4MJM0, A0A0Q6AU84, A0A0Q6LY49, A0A2S0XGD1, A0A0Q6S3L5, A0A171KR80, A0A3T0NCG1, A0A1A9FKL5, A0A256FD97, A0A256FFS6, A0A256G4H8, A0A2S8YF01, A0A1C2ITR7, A0A1C2J842, A0A1E3Z8U8, A0A1Q3Y2U4, A0A208YD18, A0A3G8GI24, A0A3P4B784, A0A1G0INB3, A0A1H4EA38, A0A1H8S321, Q139P8, A0A111P0H6, A0A2W6A035, A0A1I3D868, A0A1I7NT92, A0A1M3MMB6, A0A1Q4BP52, A0A1V3YQ38, A0A397LC17, A0A3P1USW7, A0A421C4V4, A0A227P2C0, A0A239JQK8, A0A265UXW3, A0A290XIF4, A0A2A3MIP2, A0A2D5KMOV9, A0A2D9EMJ9, A0A2I1DM45, A0A2R4GTJ0, A0A323ULE6, A0A336JW85, B3QAS0, E6VER1, Q6N8M4, A0A2R7SH02, A0A2V1K699, A0A2W6V8P1, A0A2Z2PA34, A0A316C2B0, A0A316FDR3, A0A364JTP6, A0A3S0G2U6, K8PFZ4, A0A427WKT3, B5ZEP7, K0X4J1, R5F6K3, Q2IUB8, A0A021WZC4, A0A0A8JZH5, A0A0D2EZ24, A0A0M0M4X1, A0A0M1J5T9, A0A0Q4QYE3, A0A0R0AIR5, A0A0R0AW38, A0A0R0C192, A0A126NQY5, A0A2W6U176, A0A139KPY1, A7LZL8, A0A1A51CM7, A0A3M9XF29, A0A1A9G2D9, A0A1C4GKU7, A0A1H9GAM4, H1G418, A0A1P9X300, A0A1Q3VYI4, A0A1U9Z0C8, A0A2T0JRH3, A0A2S8L2K0, A0A2S5N0X0, A0A2C9B4R1, I2IH66, A0A2M9PB49, A0A2R4XN45, A0A2W5NK83, A0A2Z3HYX1, A0A316HXQ6, A0A318TE89, A0A355Y6Y6, A0A386WVJ2, A0A3M1P6L8, A0A3P3QPB0, A0A3R2SN97, A0A3S0VNE6, A0A408NG74, A3ZTP4, C6BYK3, I9BVJ2, Q3SUA1, V8QK85, WOPCHI, A0A014NKR3, A0A077ED79, A0A0D5BL35, A0A0E9AXU9, A0A0W8ETF9, A0A0X6GYY8, A0A1A6C9T4, A0A1T3DQQ1, A0A1T3FTK0, A0A1T3M8S8, A0A290N1R2, A0A2T5RTS5, A0A2X114S4, A0A365UL46, A0A376ER62, T0PUX3, X5KP48, A0A077XWM3, A0A2T5YB33, A0A0D1VRJ2, A0A0J1BDY8, A0A2D9JA40, F2BOX0, M2A603, Q7TU08, A0A0M3C939, A0A0N1H9J8, A0A0R0DAH0, A0A0T7NVS9, A0A2G4TZ75, A0A0T9NFZ1, A0A1B1SBZ6, A0A3N2KBG8, A0A3N2MN08, A0A1G9CYE6, A0A1H0Z8Z9, A0A1B3PH24, A0A1I6VL20, A0A1L6KM73, A0A2K8PXF5, A0A380URW4, A0A3Q8XJQ7, N9GRB7, N9T309, A0A1M7DE64, A0A1T3EZZD1, A0A1T4W3Z5, A0A1W1CAK4, A0A1Z3NBH7, K7YUK6, A0A2K8KE69, A0A2N3CKS9, A0A2T1DCU5, A0A2V1IL33, A0A3N2L261, A0A3N2LRC9, A0A2W7PLV6, A0A316G4N0, A0A316MV24, A0A345ZUF5, A0A348Y552, A0A3D1D886, A0A357NLM2, A0A396N2M1, A0A3F2U2I4, A0A3M9ZEB8, A0A3N2R9B2, A0A3N7GXM9, A0A3P6MZI5, A0A419IAY4, A0A427CEB3, E1JSC3, F0SGC7, Q6MQ22, U2HAV0, A0A009CZJ9, A0A3F3L913, A0A3G9FWR4, A0A3R9CWT6, A0A3R9R2S0, N9DED1, N9S9G3, A0A069S927, A0A076IUU4, A0A078RCV8, A0A0M1VY77, A0A174MGF4, A0A174N0H0, A0A1H7H150, A0A1Q6KX4, A0A1Y4PK6, A0A372Y0K1, A0A3A5TDC3, A0A3A5XT31, A0A3A6A4K4, A0A3A6LFF7, A0A3E4KJY5, A0A3E4WB07, A0A413M950, A0A413N865, A0A415BDV3, A0A415NKX7, A6L7D2, B6VU68, C3R7G1, C6ZIF1, D1K0W3, I8ZN65, I9FJ58, I9FW43, R9HKI4, A0A072PNH3, A0A078PMY7, A0A078Q4L7, A0A0J9FIK3, A0A0P0ENF5, A0A139TC9, A0A174FWH1, A0A174JQR6, A0A174S8H3, A0A1F0IAS4, A0A1G6G4E7, A0A1G8GXD9, A0A1H4DAE7, A0A1H8A4Q4, A0A1M4YCR2, A0A1Q6GXZ9, A0A1Y4PMC5, A0A1Y4VTC1, A0A372LUR4, A0A372Z428, A0A373G039, A0A373GL67, A0A374WQ23, A0A395W1X6, A0A3A5QXJ5, A0A3A5RII6, A0A3A5T5G7, A0A3A6MDR7, A0A3E4NPU1, A0A401M0C9, A0A412BYY4, A0A412CKC2, A0A412VWQ9, A0A412ZX67, A0A414FIE6, A0A414HK55, A0A415HH03, A5ZJQ4, C3QFV5, C3QUW4, D0TQW3, D4VET1, D4WZN4, D6D8L4, D7IBQ1, D7IYD2, D7K650, ESCEN0, F7M140, I8YAN7, I9JEL5, I9PJT1, Q8A600, R5U4C3, R6JGL4, R7KNZ1, R9H255, A0A086AED5, A0A3G2GGV5, A0A0D1LYH6, A0A1T1IM88, A0A1Y3KNX4, A0A2S6W0M7, A0A3D9YFC8, A0A0J6GF61, A0A0J6HUV7, A0A0M3UDD1, A0A109R7Y6, A0A266M091, A0A266NN59, A0A267AHN9, A0A267ALX0, A0A267B3Y2, A0A267BG23, A0A2H4VYU0, A0A2T0IU19, A0A356N226, A0A433XJ62, A0A0P7B7H5, A0A0Q7TK21, A0A0Q8EKE2, A0A2S6B0H6, A0A2W5KVA1, A0A0Q9PEG0, A0A0R0DPK7, A0A0X8WTE7, A0A108TCY7, A0A1Q6FKU6, A0A1Y3YTH5, A0A1Y4K2A7, A0A374UUM4, A0A380YLD2, A0A3E4UNA0, A0A412DF46, A0A412E340, A0A412TGY2, A0A412XVL7, A0A413BAD2, A0A413E1D0, A0A413VIU5, A0A414L128, A0A414MGQ7, A0A415CJL4, A0A415RY14, B0NPS2, E5X0I7, F3PFV2, R5K927, R6ABK2, R6LDI7, S3Y512, A0A1B8ART0, A0A2L2TIW7,

A0A395SHQ6, A0A1H7NAG3, A0A1M6VD94, A0A1R1IL17, A0A1R4F8V2, A0A2X1APJ5, A0A359KCU1, A0A381AHA0, A0A235CBM4, A0A246HQN6, A0A349Y307, A0A3N1KHQ2, A0A258DJW7, A0A258UQQ1, A0A259DS30, A0A259KDF3, A0A266N4V1, A0A2G2KDG3, A0A2T5WP99, A0A327QWS9, A0A327WRU4, A0A352DX41, A0A356ENT9, A0A357KSH0, A0A374V977, A0A395M8J3, A0A3L7NZ27, A0A3L7VPB1, A0A3L8A409, A0A3P3WFA1, A0A3R4LUQ1, A0A410G686, A0A416X0V2, D2QXS5, H2FW74, K2J4B2, Q11SH0, R5AWW9, A0A009H418, A0A009H7M1, A0A009LMT5, A0A009RT29, A0A010IL67, A0A010L447, A0A010VSS4, A0A011JWM0, A0A013S4L8, A0A013SYA1, A0A014AT65, A0A014B2B9, A0A014CF43, A0A014CLX4, A0A014D1B9, A0A014DYK1, A0A014EM67, A0A014EMU1, A0A022IY64, A0A022KLH9, A0A062GGY3, A0A062KWC8, A0A062LDA2, A0A062MZN6, A0A062SMP9, A0A090B4Y9, A0A0A8XC16, A0A0B2XWC3, A0A0E2GKA3, A0A0M3BTY2, A0A0Q1JTQ0, A0A0Q5GKU3, A0A127KEC2, A0A140QRU7, A0A151YQ29, A0A1A0GDR3, A0A1C2R5Y2, A0A1E2YN84, A0A1H8NYV9, A0A1H8WW83, A0A1S2FT16, A0A1V0KA67, A0A1V2UVY0, A0A1Y3F551, A0A1Y5NLD0, A0A241YCL4, A0A241YGA5, A0A242SRL2, A0A255UKS3, A0A2I6LSL7, A0A2L1VFL6, A0A2M8MJ97, A0A2S4TB06, A0A2T5QDR3, A0A2T5QHA9, A0A2T5R2B3, A0A2T7FJH8, A0A333B3S3, A0A333Y9D4, A0A334S8K9, A0A358GYT1, A0A372BGQ7, A0A3A3D3R0, A0A3R9R9N7, A0A3R9RHT3, A0A446ZID3, A0A454VMS6, D8JHC8, F0K6J2, L9LYR4, N8S6Q2, N9ECN1, N9QGQ6, R8YUQ0, A0A009LK26, A0A022IWH2, A0A0B0KNC2, A0A1B8UE16, A0A1E7R6C6, A0A2N0WH51, A0A3N4RE39, A0A429H9B4, K9BQA7, N8QNU2, N8W6Q4, N8WBZ9, N9FFT5, N9LJQ2, N9MGH0, N9NU00, N9PN23, N9Q063, N9Q731, N9R9I1, N9RGH9, N9RX76, N9SEA4, R9B2F6, S3UES4, V2V102, A0A015S0M2, A0A015TQQ9, A0A016CKE7, A0A016DHY5, A0A016FHR4, A0A016FXS0, A0A017N4W2, A0A0E2SRX3, A0A2M9V1Y4, A0A3E1CY00, A0A412DIM1, A0A415AA41, E1WWE5, Q5L9F8, Q64PP5, A0A078S419, A0A139K753, A0A173Y2R7, A0A174A3V4, A0A174ES06, A0A1Y3V4S4, A0A285TJ17, A0A374QEX4, A0A3A5PFV6, A0A3A5RE22, A0A3A5RGC9, A0A3A5S0Z7, A0A3A5T391, A0A3A5VIC9, A0A3A5X2H2, A0A3A5XAR0, A0A3A5YEG0, A0A3ASZAT4, A0A3ASZGU7, A0A3A6BUC3, A0A3A6KI09, A0A3E4G6G1, A0A3E4I4R5, A0A3E4PTF3, A0A3E5F5J9, A0A412B9C4, A0A412JV09, A0A412XI38, A0A413NQG8, A0A414BIH8, A0A414F520, A0A414W6K5, A7UZ46, E5V8W5, I9IZT4, R7EFA5, R9HS41, A0A084EKT7, A0A085KA87, A0A0J9D443, A0A177JQP4, A0A291MZ55, A0A2G1LMZ0, A0A2W6YWT0, A0A430C674, A0A430DBL7, J2DKF0, K9DI07, A0A085ZM90, A0A226GV11, A0A0B5RX12, A0A0E1Z7C1, A0A0U3GPR3, A0A163WFN3, H1H6V9, A0A0D0F3A0, A0A0J6HYJ3, A0A0N8VS97, A0A3D3N728, A0A3N2AHR5, A0A0J6JMU3, A0A0M1I594, A0A1P8EHC5, A0A3R8ZQ88, N9BN39, A0A0M3ADT6, A0A137XWS0, A0A150HKL8, A0A150HW04, A0A2E9HRT6, A0A427VH17, G7GFC7, N8QZA9, N8YJS5, N9FGB2, N9NJ33, U7GUB5, A0A0Q8ZWG5, A0A1M5TQH8, A0A0Q9Y9U0, A0A101CNR5, A0A161HFQ3, W8KQG4, A0A162GYE3, A0A182D470, A0A1G7DCW6, A0A1G8DAJ1, A0A1H0I0T8, A0A1H4M7B0, A0A1K1YQ75, A0A2W0FMX3, A0A423E5W0, A0A1I3D7P0, A0A1I5MVB0, A0A1J7CGW3, A0A1M3ALX3, A0A1M5S183, A0A1M7AF48, A0A1M7LJY2, A0A1Q6GBS4, A0A413VVQ6, I9S8M0, U6RRQ2, A0A1T4U597, A0A1V5T332, A0A1V8RTF3, A0A2A6FGJ9, A0A316JDC2, A0A1W9NW12, A0A212ARK7, A0A2U2DG29, A0A218PTP6, D8JTS2, A0A225CZ86, A0A251ZSG0, G6F0I0, A0A257KXQ0, A0A2D7V8N7, A0A2E0J8K1, A0A2K4MLU6, A0A2N1QVJ2, A0A2N3A9B9, A0A2S5DKF7, A0A344UIX9, A0A2S8Y8S4, A0A3R1RU29, A0A2T8H1R8, A0A2W7RTQ1, A0A316RG35, A0A3R6N1E8, G9S814, R7DJM9, A0A350Z6L0, A0A3D4YVW2, A0A368KY31, A0A378RM11, H1Z6Z2, A0A395R1Z5, A0A3A8EMM4, A0A3D9G3H5, A0A3E1NCM1, A0A3N0DZ77, A0A3N4ME15, A0A3S0BMD4, A0A3S0UJK0, V2U147, D7A7X4, F3PVK4, I9SK95, R5J025, Q1MK66, R6DFK2, W4UTL6, W5WZY6, W7DW26, A0A011VLV5, A0A031M7W3, A0A023Y1Z9, A0A077KV17, A0A081U6U3, A0A0I9S5E4, A0A412Y6K5, E4W049, R5RRI5, A0A0D1XKG1, A0A438N3F5, A0A0D2BPZ7, A0A0K2IVQ5, A0A0L8A7Z8, A0A0M0NM11, A0A0M1EUK8, A0A0M1F4F7, A0A0R0B1E7, A0A0U5I966, A0A0X3QY38, A0A149QNR9, A0A1A6XX82, A0A1I6LH15, A0A1S2BCF7, A0A1V3CZL6, A0A1W1GWF3, A0A1Z2LJ61, A0A239QEP2, A0A244C0Y0, A0A246I3N3, A0A246KUS4, A0A270NJB4, A0A2G7R806, A0A2G7S186, A0A2J0T0Z6, A0A2J0TE64, A0A2J0U0Q3, A0A2J0U9X2, A0A2J0UV81, A0A2J0UZW3, A0A2M8VP52, A0A2M9QVH0, A0A2R3Q063, A0A2R7IQA9, A0A2T3X0R7, A0A2W5J597, A0A2W6GJ10, A0A2Y9UCE4, A0A2Z3YEA7, A0A317BXY0, A0A333DWW6, A0A356J1W9, A0A397NEQ4, A0A3C0X5L8, A0A3D3A2S4, A0A3D4TGV5, A0A3Q8FGU6, A0A3R2JQY0, A0A3R8TN09, A0A3R8VDD7, A0A3S7JND1, A0A431UPB8, B2FPK8, B4STM5, B8LAI3, J7UN14, T5KTD2, A0A0N9V4M7, A0A0P0FKS2, A0A108T443, A0A139KYW1, A0A1C6DCX4, A0A412IFM1, I9QGM8, R6K8J5, A0A0W0NKJ1, A0A142YAS2, A0A1B8ZBM4, A0A1N7QQ70, A0A1E5QAZ9, A0A1G5FRQ3, A0A3R3UEM3, A0A409BXT5, A0A444VYL7, J0S2Z7, A0A1G7I9H1, A0A1H4L5G4, A0A1H6JKD0, A0A2N1YBS6, A0A1K1PVI3, A0A1M5SVM8, A5FG24, A0A1M6KU38, A0A1Q6GT50, A0A3E5B9A2, K9E4J5, A0A1T4SPZ7, A0A239MDN0, A0A291R1E3, A0A2C9W7T1, A0A2G4FRC8, A0A3L7N3X0, A0A2S8G2H3, A0A327VPW9, A0A345ZYZ2, A0A357MYM1, A0A363S1E5, A0A3Q8FP71, A0A3S7K328, A0A364NHY7, A0A373J5Q9, U6RPC2, A0A3D3YKZ5, A0A3D6E7P2, A0A3E0L582, I4HK19, I4HM22, A0A3L7NHW1, A0A3L7SAB0, A0A3L9M874, N8PV73, N9LIX8, A0A3M7LD05, A0A3M7TFU4, A0A405WSY3, A0A414ZGI7, B3CF59, R7DP25, A0A431Q6E2, B7KL64, D2Z6H8, E1V333, Q983W5, A0A069SEW1, A0A073I066, A0A078SH69, A0A173W339, A0A174JSE5, A0A174PHW8, A0A174XDW3, A0A1Q6FB56, A0A223HK64, A0A3D9A6D4, A0A3L7ZG33, A0A3R6C8A6, A0A3R6JTI6, A6L8X0, C7XES2, D0TIB2, D7IHW03, E1YRJO, K6AQW2, A0A072CRI6, N8WZX2, A0A077KLF7, A0A1B8ZTK2, A0A1M7EKX9, A0A1N7I381, A0A1W1ZF7N, A0A2N0XE32, A0A316X5E8, A0A316XBC8, A0A3D3ME77, A0A3D9CD78, A0A3G5YZV8, A0A3G6PG97, A0A3G6RUU2, A0A3G6S1D1, A0A3G6TDQ1, A0A3N0WF35, A0A3N2F5P1, A0A448LLE6, A0A086Y5K4, A0A0A2LMG6, A0A0B0BV11, R5W6Y6, A0A0B4EA51, A0A2M9CAB3, A0A2W6SWJ3, A0A0D1ZH88, A0A0F5JID4, A0A0J6CSB9, A0A3R6BX81, K5ZML2, S0GND7, A0A0J7I799, A0A1H6H4B3, A0A1N6XEC8, A0A1Z3W3L7, A0A2S8ZWB7, A0A2S9D103, A0A2V2ZKD3, A0A316WX78, A0A3D9CH34, A0A3N7ABR8, A0A3S4R1X6, A0A411DJC6, A0A420CWE2, A0A0N0ZUE1, A0A0Q3I615, A0A0Q9E1I3, A0A1I1W8D8, A0A2S1YTR1, A0A344LVB0, A0A0U3RVY3, A0A1R7QG16, A0A239RYE4, A0A241UYE6, A0A373BTI5, A0A385N7Z5, A0A3C0RM03, A0A407TCN0, A0A409JX44, N9CMR5, A0A0V0PU92, A0A105T9C4, A0A172Y6Q9, A0A1H5YKS0, A0A1I2ZR73, A0A1M4TNJ7, A0A3G6MQ32, A0A3G6Q0A3, A0A1Q6HTU1, A0A1Y3Z679, A0A3E4ZKX2, A0A3R6B5V0, A0A3R6EW93, A0A3R6HQC6, A0A415P760, A7AANI, B7B7M9, K5XYR5, K5YYW8, R6Y8Q0, , A0A1U7CV84, A0A1W6MWB5, A0A1Y3QT37, A0A373HRA1, E4M7V2, I3YQ11, R5UBG4,

A0A212ADW8, A0A212JKZ9, F5J1R6, A0A258S7P0, A0A259HA15, A0A2H9TRF0, A0A2L0HV71, A0A315WFY8, R9AT24, A0A2H9U3U2, A0A2J0SXB2, A0A2P5NQT5, A0A2S1JY14, A0A2S8GDU3, A0A2S9XAH7, A0A2W2AXN8, A0A359AUM2, A0A359CJT8, A0A389LXS8, A0A3D9DAR7, A0A3N5TK36, A0A3R6NSM2, A0A3R6UQ81, A0A416XAY3, A0A3S4D4TY8, A1B0H8, F7RVX3, R5YLD6, S5XS37, A0A086A9U8, A0A0A8TQE8, A0A0M3AAC2, A0A0Q7FZB9, A0A2S9ERY0, A0A385C2J8, A0A3B7LU96, A0A3B7M3H4, A0A3G2T3S6, L9LRS9, N8TIE5, N8XAE4, N9DPM4, A0A0B2JH55, A0A0T2KYU5, A0A143XF40, A0A151XZU4, A0A177FJN5, A0A178CGW5, A0A1C0B0V1, A0A1C0B652, A0A1C2BYG0, A0A1C3CVY9, A0A1H3MS46, A0A1I6QNP8, A0A1Y3D876, A0A241W9R1, A0A404M8F8, A0A409JQ9, N8QAF6, A0A1H4Z7P1, A0A1H4LY8, A0A1M3ER55, A0A1Q3QFQ5, A0A1M5N5S0, A0A3G6NBW7, A0A1M7MXV6, A0A1N7JL1, A0A1Q4U4B3, X5KKY5, A0A1T5KKR9, A0A1U9N638, A0A266Q445, A0A1V2UVI4, A0A1W2H604, A0A1Y3D6P5, A0A1Z3LV92, A0A358J0R1, A0A399UHU0, A0A3B8UD95, A0A3D5MJ56, A0A410P2A2, A0A419MT39, L1Q170, A0A241WA72, A0A3A8EFZ1, N9DJ08, A0A2D4XWP3, A0A2D9VWK8, A0A2E3KU80, A0A2G6UM62, A0A2S9JUA2, A0A2T3DL3, A0A372FLP6, A0A3A8F9Y9, A0A3A8FMS1, A0A2UISBL0, A0A3G8M230, A0A3M9XMP1, J7QWG7, A0A2U1ZFR9, A0A449GUR3, M3V3C7, A0A2V1IYI9, A0A3N2L5M5, A0A3N2MXT3, A0A2W2AIG0, A0A2W2BFI7, A0A2W5UAT6, A0A2W6XU38, A0A355IGI6, R6W5W4, A0A359I6L9, A0A3N2KG26, A0A3N2NBS8, A0A379GEF6, A0A380WA24, B6J189, A0A396MEB8, A0A3P8L9G4, A0A3B7PMH2, A0A3D9B765, A0A3L7PHY5, A0A3N2M680, A0A3P5WT70, A0A3S0DR69, A0A412LS0, N8ZNX8, R5AP11, R7LZ25, A0A072Q359, A0A0A1VKY0, A0A0H3K4Q3, Q3L189, A0A0Q8ZHA5, A0A0R0CJL3, A0A0W0TZ93, A0A0W1A6H7, A0A150WC10, A0A1A1VW75, A0A1B2LVQ0, A0A1H4DHP4, A0A1Q6EJ23, A0A374A9F7, D4IIZ6, A0A1H4P275, A0A1M3L9B8, F8X1R6, A0A1M3QUY1, A0A2T7QED5, A0A1N6RTU4, A0A1R3W5R4, A0A1R4HWY3, A0A1V0B7X0, A0A396SCH5, A0A1X6ZIC9, A0A1Y0FZ14, A0A1Y3CFA1, A0A220RB93, A0A3Q8WE22, F7SS73, A0A239EHW9, A0A2A9D2F8, A0A2E9J0F0, A0A2S5TYH8, A0A366F7H5, A0A367U8X9, A0A367XG19, A0A3G6X3A3, A0A416W4H5, A0A432WDY5, D0L2T8, F0SF25, S3MTK0, W0DLT4, A0A081PCA1, A0A2R7K8R6, A0A088EV62, A0A0E2ZIP4, Q3J708, A0A0F5JML7, A0A0F5JLM1, A0A0M2XTU3, A0A1Q4G7P5, A0A2X2JEZ8, A0A3R4UCX8, A0A408WVW0, A0A420FD61, A0A0P0NFP3, A0A0P1E735, A0A1D8YF08, A0A1I0SA16, A0A1M3LF76, A0A212JUP9, F8WX71, A0A1P8E5M2, A0A1Q4GBA3, A0A420FFW4, A0A420VWD0, A0A1S2TVM0, A0A2V4VLU2, A0A379YJ1E, A0A3G4UL47, A0A1T5G0G1, A0A1V6AXZ5, A0A1W6V1Y5, A0A1X7KFP0, A0A2S9J7R9, A0A2V3PJC3, A0A316SX52, A0A357MJH3, A0A366F2Y1, A0A374WKY4, A0A412C8B5, A0A412D2P3, A0A3D9YQD0, A0A3L9M6T5, A0A3N2M5D5, A0A3N4PH84, A0A3N7J531, A0A3S0G1P6, F7NY17, I8U960, Q6ARU1, Q6ARU2, U2JBH8, A0A015TQY4, A0A015TX15, A0A015V418, A0A015VAT7, A0A015W7J5, A0A015X5Y2, A0A015Y9D3, A0A016CLC4, A0A017NBM9, A0A0E2AY10, A0A0E2RH18, A0A0E2T7N9, A0A2M9UWR0, A0A380YQX0, F7LSJ1, I9JUP1, K1G1Y1, R6Z2M8, A0A095W9G3, A0A0D1ZU91, A0A438NJC6, A0A0D2BWW2, A0A0J1H9X7, A0A0W8EKQ7, A0A1A2KY88, A0A1U7LEI1, A0A1Y3W1K1, A0A373UGH9, A0A3D2DVB0, A0A3S9VZT0, A0A412WUG3, A0A413H12, A0A415QCS3, A0A1V3MYP2, A0A363P1H9, A0A3R1P6X1, A0A3R5KUV4, A0A258C9B0, A0A2H0PEJ7, A0A2R8C333, A0A2S8L139, A0A354HZW6, A0A355Z3H9, A0A3N2KKD1, A0A356DGJ8, A0A417X264, R5PLH9, A0A378JXU6, A0A433KCC3, A0A3C0C3P1, A0A3D4KKB9, A0A3E1Y9B9, A0A3N2MZX6, A0A3N2NIM8, A0A3R7H472, A0A412XQV6, F3ZRP3, F4CAW3, A0A0B2Y7Y2, A0A0B2YB76, A0A1A0PJR8, A0A1I2M5P9, A0A0D1Y4N0, A0A0F7D0X1, A0A0U4HW57, A0A1C7WCR0, A0A292A8N3, A0A3G2FHK8, U2LMY3, A0A0L8M411, A0A0M9Y8C2, A0A1A0J2D1, H5U4N0, A0A1H2KAX7, A0A1H4G980, A0A1Q5A1S8, A0A1Q6EH61, A0A1V4Q419, A0A2S9SNP9, A0A2S9TL55, A0A3Q8TQE8, A0A2V3PK20, A0A378LE09, A0A3G8JU80, H5TN52, L7KIR7, R7F4F7, A0A0S9QYK1, A0A0W0X1M8, A0A378L3J1, W0BIG2, A0A101K1P0, A0A1J0DQ52, A0A1M4ZCU4, A0A1X1R7N4, A0A2D9NX44, A0A3N2EXF5, A0A433WC40, H5UAY1, L0G3J5, A0A060B018, A0A1U9RE10, A0A2A4HNR1, A0A386X0V0, F7SND0, A0A1Q9U5W2, A0A1T3E5R8, A0A2H0I765, A0A378I2N7, A0A378KSV3, A0A3A9K0A5, A0A3B8W4W1, A0A3E4JJK0, A0A412PCE6, A0A414LLU8, A0A414ZVX5, A0A415EJ9, A0A448J0P4, DIAQ8S, T0I236, U2SP99, A0A0H5S8I7, A0A1A0RBS0, A0A1A0VRL3, A0A1B9D4Q7, A0A1E7Y967, A0A1Q8XZ61, A0A1S1JXQ4, A0A2A7P638, A0A393YSH1, X5LWC1, A0A0J8U2P6, A0A100WSA5, A0A1A3A1Z1, A0A1A3BCM1, A0A1X2B7G3, A0A378UZK0, A0A0W0ZSD4, A0A0X3TJY9, A0A3S9TRJ4, A0A410H6D4, A0A132EL86, A0A1J0KSG9, A0A1Q4A9R1, A0A1X0DMJ6, A0A2G5PBW8, A0A2G6TYH7, A0A378JPT9, A0A3Q9XA75, A0A3S0DCR3, A7ING1, A9H2I4, M0BQI6, A0A024QLX2, A0A1W9YR99, V5X6W0, A0A0D1LMY9, A0A1A0MII9, A0A1A3H7C6, A0A1H4AD50, A0A1M9RZ34, A0A1Q4U9C4, A0A391PLLI, A0A433BRC5, A0A0H3WV15, A0A109JL33, A0A174B4J7, R6XP32, A0A1N6IBD7, A0A1X7CGH1, A0A243Q7V5, A0A2S8FEC9, A0A316JPU2, A0A3D5A8E6, A0A431I2W8, E0UMW9, A0A0B6RUD1, A0A0Q5JYD2, A0A0Q5KAS7, A0A0W0YBM7, A0A0W0Z720, A0A2H5FQ31, A0A172UIH0, A0A1B9S125, A0A1G0CFA8, A0A261CVZ1, A0A2R7N159, A0A3L7STP3, G5H9U7, G7H7N9, A0A1C9W8W2, A0A1D8U3Z6, A0A1P8X7Y5, A0A1Q4H8W4, A0A2H9SFH2, A0A370KRR3, A0A378JFF6, K9YIH5, A0A259RPK8, A0A376DS34, A1TGI2, A0A0A1FYV7, A0A0N9YMZ3, K0VE06, A0A1D9GV80, A0A1R4HLD4, A0A257XKF3, A0A258IRH7, A0A257ZDV1, A0A258LVC5, A0A259CGR4, A0A2D0JN17, A0A2D0JW54, A0A2G0Q719, A0A378SUG9, E6TJL9, A0A3S0EHG5, M5U236, W1J122, A0A0W0WG64, A0A1G5DJF8, A0A1M5REB7, A0A1Q2M653, A0A1Q3ZH77, A0A248UL94, A0A2P9HP73, A0A3S0VJR2, A0A427S175, A0A433NP38, D5SY16, A0A0W0V8C1, A0A258MTA7, A0A259IQS6, A0A2K4P253, A0A383N277, A0A2L1UYJ8, A0A2S8GTJ2, A0A378ILB9, A0A378JP23, A4SWQ1, E0UJA9, A0A292AD17, D8D2Q0, L0DSM4, A0A090D1B0, A0A1D9GBR8, F4XTF7, A0A1Q4Z7M4, A0A2M9KEH7, A0A3G4W6F3, A0A3N6EYS3, B4V8H5, A0A1V0R3H5, A0A2V2AXW0, A0A378JY28, A0A3N5T8A3, M0APS3, M0BDA3, A0A0G3IV1A, A0A179EF73, A0A2A5QYA4, L0JH43, M0C547, A0A1G8VCI4, A0A1H1AMX4, A0A1H6PQR7, D2RZ16, A0A1J4LSK7, D3T065, M0A4B8, A0A1N7FW83, L9WE63, A0A202E7K2, A0A2B7GNN5, I7CFJ5, A0A2V1K020, A0A2Z21H13, A0A372FLR7, A0A3A8FCW1, A0A3A8GJG7, A0A3R9FF03, A0A3T0NIR2, L0AL27, L9Z6K2, L9ZED6, L9ZK89, A0A100X210, A0A448HL24, A0A178LTM0, A0A1C4SZK5, A0A3S3E8P7, A0A0D8I0N2, A0A2A3FEV5, A0A3E0D0I2, A0A0D8I0P8, A0A2A3FFF7, A0A3E0D250, A0A166RQ67, A0A1A3D395, A0A1A3MIW6, A0A1G6NT22, A0A370F6G0, A0A1J0TLJ2, A0A1X7LQN2, A0A2Z4VHZ2, A0A385LIU4, V9XIU5, A0A1Q4UC02, A0A328CSX3, T518V1, A0A3N6M2U7, E1RGB3, L9ZV17, M2WIR8, A0A073IP05, A0A174CW35, A0A223HLA5, A0A355XG95, A0A3L7ZFS1, A0A3R6BCI9, A6LA23, C7X762, D0T9F4, D7I0Q3, A0A0I9TEA2, A0A1A2W256,

A0A1A3G4Q5, A0A1A3TZX9, A0A1B8SIG4, A0A1R0TU92, A0A1X0FAF5, A0A1X1TPS4, A0A1X1VXS9, A0A1X1Z9X4, A0A2S8C002, A0A0W0WVVF4, A0A117L36, G7CFJ3, A0A1A2EEB4, A0A1A2XKC5, A0A1A3U0S3, A0A1X2DR10, A0A1A3JCA4, A0A1X2E1Y6, A0A1B4Y2G6, A0A2Z5TPD9, A0A3E2MNL2, A0PSU0, B2HRY6, A0A1E3SVF3, A0A1G8EZE4, A0A1Q5MKN1, A0A3N1SLH1, A0A1W9YC52, A0A1X2C0K4, A0A329L0T9, FSZ339, A0A1X0EAP7, A0A1X1YA39, A0A2A2WNT6, A0A2S0QIS9, A0A2T5AS19, A0A2R7JT02, A0A2V0N9B7, A0A3R5WC60, A0A420C1M3, I2DV72, A0A010NHL8, A0A100W4D9, A0A1A0XS11, A0A1X0AX65, A0A1Y0BXT7, A0A100ZCL2, A0A101BH59, A0A101BSU8, A0A117JNE3, A0A124EP60, A0A1A0RP49, A0A1A0UWP9, A0A1A2DBM8, A0A1A2L748, A0A100ZH4, A0A100ZYH7, A0A1X0C0T7, A0A329LFB6, A0A1A0QR31, A0A1E3RY99, A0A1A3T9B7, A0A1E3REZ1, A0A1H6JD05, A0A1X1WMY8, A0A241W3N4, A0A2A7N522, A0A2S7NH33, A0A375YC91, A4T606, A0A2S8L640, A0A2Y9BTT7, A0A346PBK3, A0A346PM20, A0A370CXJ6, A0A3S4RC60, A0A069JAD8, A0A0E4A428, A0A1C4FUA1, A0A1F2PZT1, A0A1Q4JVV5, A0A1X0M2N7, A0A2A5JIN2, A0A328CUU7, A0A3E0SFN0, A0A3G8ZTU2, A0A3N7CYD8, A0A401N1Q9, C0ZSU9, C3JIB6, TS12X8, A0A078Q679, A0A0J9FBY0, A0A174U831, A0A1C5TVN6, A0A1E9BS29, A0A1F0J2U6, A0A1G8I4F2, A0A1H4D0R7, A0A1I4TD06, A0A1Q6HF66, A0A1Y4V1W1, A0A372YWE7, A0A373G6B4, A0A373G9Y1, A0A374WLM6, A0A395VXN4, A0A3A5QLJ8, A0A3A5S8X1, A0A3A5TTU2, A0A3A6MNQ4, A0A3E4NB65, A0A3E5G506, A0A3E5SHQ0, A0A412BVG5, A0A412CLG4, A0A412VKU2, A0A413A1C2, A0A413V1I5, A0A414E6J0, A0A414GNV1, A0A415FIM7, A0A415HQR7, A0A415IG77, A0A415K6V8, C3QE97, C3QTC9, D0TW00, D4WB04, D6D2E2, D7J8T7, E5C4N2, F7M8L2, I9HSE8, I9JMQ2, R6JC52, A0A0D8HVVY7, A0A235G916, A0A2A3FB46, A0A3E0D162, A0A0P0ER20, A0A174S4C2, A0A1H8MYU6, A0A1Q6GD28, A0A372UNN6, A0A413VA20, D7IHZ9, I9RQ53, Q8A8A8, R7KP88, R9HF01, U6RDB7, A0A1A3BNU6, A0A1H5VD66, A0A2E3RFR5, A0A2R5HFS9, L9ULR8, M0ACY9, L9XR17, L9YYM0, M0C7W7, M0M940, A0A0D5LRG8, A0A127C1I2, A0A1U9Z3I3, A0A2E1EBT8, A0A1S1Z0A8, A0A2T0J5E8, A0A358M2G2, A0A3B7MBJ6, A0A412SLX7, G5H9N3, D6YUT1, A0A090R482, A0A1B1FYC1, A0A1W6TCX1, A0A2D5H612, A0A2E2C885, A0A355G5Y8, A0A3C0AFP2, A0A3D3R083, A6C6S2, A0A2N3Y397, A0A315Z5Y5, A0A3C1V491, A3ZTE6.

Uniprot ID in Cluster 2:

A0A0E1R9M7, R6E5C0, A0A143XNH6, A0A0B8RFX6, R5FLJ2, R7CHN4, A0A1Y4AW99, A0A1C5S406, U2JZ29, A0A0B5BL61, A0A415B0R0, A7A5K1, A0A173S915, D4W470, A0A261F9J4, D1PI43, R5YR15, A0A3G6JCP5, A0A0M0FBH7, A0A1Y4H217, A0A1Y4MEF4, A0A1Y4NUU5, R6CAG1, A0A0E1Y3I4, A0A454IGR7, A0A1Y3TIK0, R6M0J7, A0A0M6W5M3, A0A173R505, A0A173SD52, A0A173Y6I5, A0A174KF62, A0A1Q6PLC9, A0A2U2EG89, A0A350VIB2, A0A350WKL5, A0A355TKV8, A0A395UUA7, A0A396FJ19, A0A3D1NZH1, A0A3E4E558, A0A3E4M6Y2, A0A3E4WPS5, A0A3E4Y6F1, A0A3E5AIW5, A0A412PZL6, A0A412RJ33, A0A413M361, A0A413PGE8, A0A413R412, A0A414A0U4, A0A414IVL7, A0A414ZN06, A0A415K135, C4ZH57, D4JHC8, D6E0P9, R6TAE1, A0A1H6T0E8, A0A350BB77, A0A3D0GRH5, A0A3D0JDD3, A0A261F7B4, A0A3A9BZV6, A0A133KV98, A0A133LEY1, A0A2K9AHA9, C2GX43, D4BPE8, D6DDI0, G4XR37, A0A1C6A728, A0A355W0S6, A0A373JWY5, A0A3C1J2J9, A0A3R6J5V3, A0A3R6P211, A0A3R6WQI8, A0A417EAS8, R6W6M4, A0A1Y2SXQ6, A0A1Y3UHG1, B7AVX6, C0ERS1, TOVL23, A0A1C5SSLT0, A0A1Q6SET1, A0A3B9CEQ7, A0A3D5M000, A0A3D5XVA2, A0A416NQW8, A0A417QJ83, A0A1Y4V9B6, A0A416KRN0, A0A0L7BR19, A0A0L7CYU0, D3R554, A0A1Q6QMK1, R6H1X4, A0A2P2F3W0, K1UAF6, A0A2U1TD49, A0A328RY87, A0A328SRX9, A0A174Z2R4, A0A174ZPF2, A0A349APQ6, A0A351RFF0, A0A395Z990, A0A3C0MMK1, A0A3D1NJP5, A0A412I1P2, A0A413P6M3, A0A413YS81, A0A414D7P3, A0A415PAJ0, C4Z337, RSZQC1, A0A375I2S6, A0A383S6V1, A0A0X1TKG7, A0A173WWH7, A0A174VER8, A0A316Q0A1, A0A3C1ED36, R5K9B3, R5RXM5, V9HE23, A0A099HRN5, A0A0M3DIP7, A0A1X2JFN0, A0A369P9T1, T4VSU6, T4W2Z3, A0A0B3VRN3, A0A0F4W1R5, A0A0F4W3H4, A0A0F4W0W5, A0A0Q0XYA6, A0A1F1KT76, A0A2S7FFA9, C4IFX8, N9Z5U0, A0A0H2YTH6, A0A127EG66, A0A133MGA8, A0A2X2YMA4, A0A2Z3TVF9, A0A317TKW5, A0A336Q1V0, A0A381IXY0, B1BP69, B1R6H8, B1UZB0, P54965, A0A0K9NBB8, A0A0M6WTT5, A0A0M6X0D7, A0A173URL3, A0A173VRA0, A0A173VTD0, A0A174BD78, A0A174BY25, A0A174LEB1, A0A174YQK7, A0A174ZYD3, A0A1C5KQA5, A0A1C5MW64, A0A1C5SY29, A0A1C5WLC3, A0A1C6C2Y1, A0A1C6F625, A0A1C6JZ41, A0A1I2CXX1, A0A1L5KKS0, A0A2A7AHW5, A0A2A7B2C0, A0A2N5PBH7, A0A2U0ULE0, A0A373UFS1, A0A373Y5I3, A0A396AC75, A0A3E3DPE3, A0A3E4ECK1, A0A3E4GNL0, A0A3E5E3G7, A0A3R5WRX9, A0A3R6BHB6, A0A3R6D207, A0A3R6DCFS, A0A3R6DXX0, A0A3R6TP59, A0A3R6TPT2, A0A3R6W3M9, A0A3R6XN01, A0A412BKW2, A0A412I8J6, A0A413R900, A0A413YQ76, A0A414T2V7, A0A416AXK1, A0A416KVG3, A0A416NWX3, A0A416PNL5, A0A416PZA0, A0A416WJ17, A0A417GJS8, A0A447DTX1, A5ZA20, B7AU47, C0B656, C0FVR9, C0FZJ2, C4Z753, D4CBA1, D4KLW5, D4L243, D4S2E5, G2SYPS, G5F6K1, G9RVK1, U5FBV4, A0A109RMF8, A0A174UKW2, A0A140DV06, A0A173S0W5, D4W7N5, A0A174C042, A0A1C6G0Y3, A0A1B9AFT9, A0A1C5QMR1, A0A1G5AJG7, A0A1Q6K8R9, A0A317UDN1, A0A367G0I4, A0A3S4ZH42, A0A416H6H1, A0A416R0B5, A0A416VJ90, A0A417KEU5, D4LWN3, U2D1J9, A0A1C6LDN1, A0A1I2QFR2, A0A1I6Q0I3, A0A1I7I0F4, A0A1M5SGJ7, A0A1M7N5N3, A0A1Q9JF45, A0A1S9CUC8, A0A1V1I0E7, A0A1V4SY25, N9XJS0, A0A2A7MFV8, A0A3P6KBF8, A0A2N6SN11, A0A2S7MW92, A0A2V2F5A4, A0A316N4U5, R6DRK3, A0A352T4N3, A0A3D2DP00, R6K8P5, R6K9V2, A0A355PNW0, A0A396Q774, A0A3R6NVM9, A0A3R6Q9V1, A0A417EV06, A0A417WHV2, A0A371J236, A0A3D4MY88, D4W3C7, F2JJC0, A0A089ZEC1, A0A090IAU5, A0A2H4VEX9, A0A2H4VM44, A0A347AKF0, K2QWX3, A0A174DZS1, A0A1C5QB86, A0A1C5V0T2, A0A350S3F9, A0A373KPY3, A0A373UJM3, A0A374BA41, A0A396LQD1, A0A3D2PRE5, A0A3R6M3G5, A0A3R6PIB0, A0A3R6PIC5, A0A3R6Q5F4, A0A3R6QCS3, A0A3R6WYTI, A0A3R7BHS7, R6P0A1, A0A1C6BYX0, B0A6U0, R5XNS0, A0A1D3L215, A0A1Q6SIR5, A0A349QN89, A0A3R6B4X0, A0A3R6DGJ6, A0A3R6DN67, A0A3R6GNY0, A0A3R6K7Z9, A0A413HPF4, C7GBJ1, D4KYR1, A0A1Q9YNF5, A0A1Y3T393, A0A1Y3XZL7, A0A1Y4E6X7, A0A1Y4TQY2, A0A2A2HAU5, A0A3D1LEA3, C7XY07, I5AXQ3, R6FTQ3, R6KMG9, R7BS06, W6RZA8, A0A0R1SYU9, A0A0R1U3N2, A0A174B480, A0A395V718, A0A3D4Y1C8, G2SYJ2, A0A1Q6ML00, A0A356C583, R5DR85, A0A1Q9Y9GW9, A0A1U7NGA1, A0A1S9CKC1, A0A1U7NP31, A0A1Y4LZA5, D4JFU4, R7A4S2, U2QTL3, A0A2K4ZM83, A0A2V2EW65, A0A2V2FCR4, A0A3A9E5C4, A0A3D3T9D1, A0A3E4LQA4, A0A414P478, B5CMZ6,

V8C360, R6SY59, R9J231, R9LND2, R9LUA7, U2D571, A0A060RFW0, A0A0E1XHN5, A0A139R143, A0A1S5WC01, F5X071, A0A099YB76, A0A0D4CMX6, A0A0R1NYZ2, A0A1H0CSY4, A0A315ZK22, A0A425XAD1, A0A0E9FQH4, A0A417CYE6, R5Z5S4, A0A125RC89, A0A135YR35, A0A211YIP7, A0A3E2SDP1, E0PCV1, F5X5T2, A0A137PLT1, A0A1B3P0S2, A0A1Z1N6Y5, A0A256MKD6, A0A267MB76, A0A2M9NLT2, A0A355X539, A0A3G2JV80, C2E6V6, F4ACA3, Q74IV4, Q9F660, A0A140DWG5, A0A1Q9YLM7, A0A143XRB6, A0A172Q6Y8, A0A173ZRU9, A0A174D5Q4, A0A1Q6MF10, A0A348RAM9, A0A374JSN5, A0A3A6JU2, A0A3R6A0S1, A0A416V8I3, A8SVL9, D5HDP5, R5WKT4, A0A1C5X749, A0A1C6KHI5, A0A3C0LUL6, R6BZT4, A0A1C6GA97, A0A1Q6KSE8, A0A416MP57, A0A1D2WI06, A0A328S1R4, Q2NGA0, A0A1Q6E3H1, R6HU74, A0A1Q9J6H4, A0A1U7NKD7, A0A1V2YDK0, A0A1V3Y409, A0A1Y0E209, A0A2Z6PMH3, A0A448F2V8, A0A348ZAL6, R7NTM7, A0A354I2N8, A0A374X3N4, A0A391P959, A0A412ZQH6, A0A396KEZ6, A0A3R6UU98, A0A3R6X3J5, A0A416IZE9, A0A417LXR2, R5ILU6, A0A3A8WNH7, A0A3D0HN78, R6ZXB8, A0A3D5TGZ1, A0A437ST59, A5ZM11, I7LGS2, R5IJX2, R6EQM7, A0A023J8T6, A0A073JMA4, A0A0S4NP87, A0A0U5F994, A0A0U5K4C1, A0A0U5KD37, A0A143PX53, A0A1C1ZVB7, A0A1C2GF65, A0A1S9ASW6, A0A1X8V8B3, A0A1Y4PBB5, A0A244CGC2, A0A256SJG7, A0A256VE65, A0A256VLQ7, A0A2A7QJH4, A0A2A7R790, A0A2S1EQX2, A0A317GGP5, A0A317GQM6, A0A347T6P0, A0A363ECG2, A0A3M6SIX9, A5VJH0, B3XRW1, R9W174, S5NRV3, A0A087QD49, A0A133PFF2, A0A1V0FWZ3, A0A1V3Y3F8, A0A249NJ41, D1YJ92, A0A091CAS1, A0A1H0M6W6, A0A1H0XV38, A0A1H6RX15, A0A1H8ZKZ8, A0A2X3WD56, A0A352TP10, A0A380KNN4, A0A3C0SGV7, A0A447UCD1, S5QWI2, A0A0D81VP2, A0A372V594, A0A372WLB5, A0A3A6E6N2, A0A3A6JT86, G9RDX7, A0A0E0UXH6, A0A0H3GEE9, A0A1D2IZY6, A0A241SSH7, A0A2Z5BZ01, A0A3A2SS14, A0A3D7IYZ8, A0A3H3DTR5, A0A3H4AY17, A0A3Q0NGD6, A0A3R5TD68, A0A3T1HY25, A0A3T1HPB0, A0A3T1JNH0, A0A3T1NIF8, A0A3T1R352, A0A3T1SAK6, A0A3T1U298, A0A3T1Y7V5, A0A3T2I1S1, A0A3T2N0Q6, A0A3T2PKR3, A0A418RW60, A0A454IN31, Q8Y5J3, A0A0F5Z9J9, E3ZSC8, A0A0H2Q3Y9, A0A242K0J4, A0A3F3M0H8, S1NFJ1, S1RL15, A0A0M2NIU1, A0A0M3D9H6, A0A2S8Z9B2, A0A366CN79, A0A3S9WFJ0, A0A0R1GBC8, A0A0U0XIZ3, A0A109DF58, A0A135YY01, A0A1C2D432, A0A226UCL4, A0A226V518, A0A2A7RIQ3, A0A211WIX4, A0A2N5KW84, A0A378H9W8, C7XG19, D5H2W8, E3R2L1, K1N5Z9, V5ENI3, A0A0R1HNK1, A0A0R2KBY6, A0A1Y4Q741, A0A2A7QF28, A0A2A7QVM0, A0A3R6BUP9, E4SIA7, F0TEJ3, F2LZ53, R5YIN4, A0A0R1NG39, A0A0R1VAR6, A0A0R1PDJ9, A0A0R1TYJ4, A0A3B8RIG3, A0A0R1U9F4, A0A0R1UBK2, A0A0R1WN16, A0A0R1X9A5, A0A0R1Y0I1, A0A0R1Y689, A0A0R2KYQ1, B9V409, E4SJ30, F0TF04, F2LZQ3, G1U9U7, Q5FK51, A0A0R2MNP0, A0A0U3CT45, A0A0U3FFW7, A0A1E7RZ97, A0A1I5H0Y8, A0A317RTB3, E3GK87, A0A126R021, A0A147E4E3, A0A173U973, A0A173UXL2, A0A173V7R5, A0A173W446, A0A174D8V8, A0A174EB34, A0A174GR10, A0A174HSI5, A0A174V5X0, A0A1C5KYY2, A0A1C5M099, A0A1C5REX8, A0A1C5SRZ46, A0A1C5SSWR5, A0A1C5TMU3, A0A1C5TNT1, A0A1C5U7I7, A0A1C5ULN3, A0A1C5UZX7, A0A1C5VAP5, A0A1C6AVX0, A0A1C6BVX3, A0A1C6E9I8, A0A1C6FXQ7, A0A1C6IFT3, A0A1G5FIB9, A0A285PRT2, A0A2N5NEG8, A0A317UFD6, A0A354Q3D6, A0A367FUZ2, A0A373I7U3, A0A373IBD6, A0A373IZI9, A0A373N7V3, A0A373V9R9, A0A373YX51, A0A374AYZ4, A0A374DEC5, A0A374IIT1, A0A374J2N7, A0A374KL04, A0A396LS19, A0A396NFL5, A0A3A6FRD9, A0A3A6GYI8, A0A3B9CDY0, A0A3E5E3Y9, A0A3R6DJG5, A0A3R6FU96, A0A3R6K169, A0A3R6N0X3, A0A3R6E564, A0A3R6X451, A0A3R6Y669, A0A412MA68, A0A412RTM4, A0A413J7I5, A0A414U0Y0, A0A415FJV4, A0A415HK39, A0A415VWX2, A0A415XYN5, A0A415Y8U9, A0A416AEU2, A0A416AQM9, A0A416B9V6, A0A416CXY3, A0A416I706, A0A416IZJ6, A0A416JTV4, A0A416LN71, A0A416NHZ1, A0A416NL9, A0A416RIQ2, A0A416S410, A0A416V4U5, A0A417AD06, A0A417B4T6, A0A417C6D6, A0A417CDY8, A0A417CPV4, A0A417DG16, A0A417DH86, A0A417DMZ0, A0A417FAS6, A0A417HD86, A0A417JIK3, A0A417KIA5, A0A417L2T4, A0A417MDD9, A0A417PZZ0, A0A417R5E7, A0A417U371, A0A417UR10, A0A429YAE3, A5ZWR0, A6BGZ5, A7AYV0, B6FUE5, C0EW54, D4LLG0, D8F1I5, F3AU77, F7JVM0, H1AL96, K0XI33, L1Q414, A0A173ZCD7, A0A173ZSA2, A0A1Q6TRJ6, A0A3A6GUA9, A0A415LCP8, A0A415WPQ4, A0A415Y2J9, A0A416BBP0, A0A416LBZ6, A0A416MD51, A0A416MR29, A0A416Q7Q7, A0A416SDX6, A0A416YC95, A0A417AXL6, A0A417BHU6, A0A417D670, A0A417E030, A0A417E3A7, A0A417FIG0, A0A417G3L6, A0A417H284, A0A417HIB2, A0A417JVE5, A0A417LJ96, A0A417MEL6, A0A417P8R1, A0A417PR59, A0A417SH44, C6JFG7, R7CCL1, A0A174AW35, A0A413AVI7, A0A416BUK6, A0A417DPL8, A0A174YG41, A0A1I2BEY2, A0A2U0UGA0, A0A3D5LVJ2, R7NAK8, A0A1B3PSG7, A0A256MHW8, A0A2M9NK78, A0A3G2JUV8, A0A3T0TZM1, F4AEI5, Q74JG0, V5P3X6, A0A1C5UA92, A0A417U997, A0A1C5WQD1, A0A1C6GFX6, A0A373Q8M3, A0A3D0EE42, A0A416CZ55, A0A1C5Z8M7, A0A1C7GPM6, A0A1Z2XM94, A0A1G5VKN3, A0A1G9IWK0, A0A239RB68, E8JMJ8, T0TGL2, A0A1HITAA0, A0A1S2MYB7, A0A1Y2KHY4, A0A2N6PZ55, A0A433FSD5, A0A1H4AGX4, A0A1I4SLG2, A0A1L8WSH7, A0A1Q6LXE6, A0A1V2M3R1, A0A1V8XEK5, A0A2U2P6X2, A0A366UK59, A0A449E3A0, I6T8Q1, A0A1Y0E6K8, A0A2Z6PN00, A0A448F386, B9V405, I7KH79, Q9AHJ7, A0A1Y0F7V3, A0A2A2WVV0, A0A2A2X7C2, C7AQX9, V6DNN6, A0A1Y3WM06, A0A1Y4T1X8, A0A1Y4BP1, A0A235ACP4, A0A246E4A7, A0A330FQ40, A0A420BR71, U2YX28, A0A2A2WNN7, A0A2S0QJ55, A0A2A7R2V0, A0A2N6QXF9, A0A2J6NMJ5, A0A2S9QS61, A0A2V1JL81, A0A3R6VAN7, A0A2Z6TDR1, A0A315XNV7, A0A328SJG1, A0A353J955, A0A358PTH4, A0A366UDC1, A0A374VXM1, A0A3A9A043, A0A3A9AE46, A0A3A9FHH6, A0A3A9IM96, R9L7D2, A0A3D1WNE0, A0A3D2JG18, A0A414J276, D4LY45, A0A416PTX2, A0A425W8A8, A0A425FWF1, B9V406, G1U9U5, Q5FKM3, C2EMP6, C8P827, D3E3V7, E0Q6H0, E3C6Q7, G2ZBL9, K0YYL5, NIZYH1, R5H420, R9IW99, R9JAT6, R9SK06, S0ISH5, S0KIU2, S4CF20, A0A022NDM8, A0A0M1X7T9, A0A0M1Y0A7, A0A0M2AMB6, A0A0M2B376, A0A132P8Q3, A0A179ETF2, A0A1L2G1K1, A0A1V8XDG6, A0A1V8YGG3, A0A1V8YNNW3, A0A1Y3H821, A0A242E0P4, A0A242IHA8, A0A2C9XQG4, A0A2N8PS02, A0A367CHB0, A0A3F3G9H4, A0A3N3RIV4, A0A413ALF2, A0A449ECJ2, C9AMC9, C9B760, C9BYD5, D4RJY9, I6T7U8, J6XSR0, J6YVL1, J8YNNM4, L2LE36, Q3YIM8, Q83Y22, R2NY54, R2PCI7, R2PT31, R2Q0A2, R2RST5, S0RYW8, S0S4J2, S4DWM3, U7TZH8, A0A062X2Y1, A0A098CP10, A0A099DDY6, A0A1G1SJ71, A0A377FWS1, U1N7R5, A0A0F0CFV2, A0A1I0H2Z2, A0A3E2VIM5, A0A3E4U6N6, A0A412YWB1, R0B1Z5, R0B824, A0A0F7Q0L6, A0A1D7TU51, A0A1V9R776, A0A1Y0FAT6, A0A1Y3S1U7, A0A255VGP7, A0A2A2WVX3, A0A2A2X751, A0A2A7QMY8, A0A2A7RAN3, A0A2G4RGS1, A0A2U2M421, A0A3R6G2L9, A0A3R6IVM5, C2EIL7, C7AQW7, C7AQW8, C7AQX0, C7AQX3, C7AQX4, C7AQX5, C7AQX6, C7AQX7, C7AQX8, C7AQY2, C7AQY4, C7AQY8, F5VG40, F7QWZ2, H7G1D2, J7H3P9, V6DJY5, A0A0G8G768, A0A1I2RXD4,

A0A3E4MEZ7, E7FQ75, G2SQF3, R6SSW3, A0A0G9FCP1, A0A0R1V0X5, A0A0R2G1E1, A0A0U3A8B5, A0A162F1W8, A0A165Z1U4, A0A199QB80, A0A1B1FMJ8, A0A1P8FCL4, A0A1U9X493, A0A2S3U546, A0A387E1J4, B1PM93, B5ACH5, B5LVL5, B9V0U3, B9V401, D7VDZ4, Q06115, Q2MJN5, A0A0J8Z356, A0A1C5MV31, A0A2T3G497, A0A396C034, A0A416DQP2, A0A0M1Y1T0, A0A0M2B2Z0, A0A132P9C9, A0A133CQ73, A0A1X4JG45, A0A2S7MA35, A0A2S7RCY1, A0A2V2PH40, A0A3F3NRP2, A0A3N3RS18, C9B4Q8, C9BZ31, D4RIJ8, J6XUE3, J7CXA8, R2LDM6, S4DXT0, T4JWA6, U2QEN7, U7U1Z8, A0A0M2AE59, A0A0M2AVA5, A0A0M2CPT7, A0A0U1B2B2, A0A111U5G7, A0A125W9K2, C7CXJ5, C7V8L2, E0H8W5, E2YTX6, E6EXK5, E6GLC7, E6GSA2, E6H3M8, E6I7M9, H7C725, Q8KUA7, A0A0M2LVH9, A0A430E094, A0A0M6WH75, A0A173RY76, A0A351R4J7, A0A374HUA0, A0A3B9DCP6, A0A0M6WMX1, A0A173SJ73, A0A173ZT04, A0A1Q6TAM9, A0A396AH21, A0A3D5LFE0, A0A3R6C001, A0A3R6CSJ4, A0A3R6HN67, A0A412FFM9, A0A413TSA5, C0FNH6, R5HRW4, A0A0R1U1F4, A0A0R2AM52, A0A222W4K6, A0A226RN51, A0A2I2AD82, A0A0R2I0I1, A0A0R2IJM0, A0A0R2J798, K8E691, A0A0T2KUG7, A0A0U2XG82, A0A365K8K5, A0A0U2Z4D8, A0A0X8PQC8, A0A1L8SG36, A0A1V8ZND8, A0A200IHT4, A0A242C181, A0A242CVF0, A0A242D4N3, A0A242ELU4, A0A291DPZ7, A0A2C9XLP5, A0A377KXR4, A0A415EY36, C9A4U0, C9CPT8, F0EMQ9, R2RTD4, S4B775, S4DSJ9, T2NK67, A0A143Y4H9, A0A143YBW4, A0A143Z5L8, A0A173S778, A0A174H2D6, A0A1C5VW41, A0A1C6CBS2, A0A285PUL7, A0A374NGP6, A0A415G6B1, A0A415TWG6, R6GBZ3, A0A173V1M8, R5TDR5, U2QSW8, A0A173W138, A0A447DTC3, D4KM46, A0A173ZET1, A0A174NYZ7, A0A1C5LSC3, A0A395XE29, A0A454HK17, R7D9J8, A0A174DZA2, A0A373GXU8, A0A373N176, A0A373P0J7, A0A373S5C7, A0A396P890, A0A416EU41, A0A416RVP0, A0A416TNN4, A0A416U4W1, A0A416Y536, , A0A416ZKK4, A0A417CF26, A0A417I9S5, A0A417MQM8, A0A417SAQ4, A0A417X176, R7JVZ2, A0A174XST7, A0A1C6D4X8, A0A1C6DGT8, A0A1C6DLDS, A0A1C6L0F4, A0A417D7T1, A0A174ZD20, A0A1Q6NXX3, A0A3D4MNM8, B0MLV6, D4JU54, D4MLI0, R6SFS7, A0A1C5KPS2, A0A413HW67, A0A1C5L0B6, A0A1C5UJ05, A0A1C5Y8A8, A0A352BJZ3, A0A374DU98, A0A374IKW6, A0A1C5LGL2, A0A373NNT7, A0A3D2XP32, A0A1C5M2J2, A0A1C5PN24, A0A395YBN0, A0A396LCD1, A0A1C5PCN0, A0A1C6BEG7, A0A373BAF8, A0A373C5R4, A0A373CDN5, A0A373CMX4, A0A373CZQ9, A0A373D2R5, A0A373D8E7, A0A396NRI2, A0A3A6KK06, A0A3R6HNL7, A0A3R6I4G7, A0A3R6QW22, A0A3R6R4L0, A0A416C4X5, A0A416YJB3, A0A416YTS2, A0A417X670, D7GS68, R5G8N9, A0A1C5QNJ0, A0A1C6BWA1, A0A1C6HPF8, A0A352CZQ4, A0A356CX01, A0A373LHU1, A0A373MJV8, A0A373Q2W4, A0A373SEK8, A0A373UZP9, A0A373V942, A0A373VX24, A0A373WCK1, A0A373YBT5, A0A374BEB8, A0A374BM57, A0A374EH0, A0A374G7H5, A0A374HQ62, R6U6R1, W0U3I8, A0A1C5QX53, A0A1Q6MRQ4, A0A2T3G0R2, A0A373M4Z3, A0A373R5F5, A0A373XM22, A0A373YF15, A0A415XEC6, A0A416FYC7, A0A416H3U4, A0A416WTS3, A0A416YBF0, A0A417G7G9, A0A417IY90, R5QNZ1, A0A1C5SR1Z9, A0A1Y3UA35, A0A1C5TY89, A0A374BXE7, A0A396PUX8, A0A417BDN5, A0A417FMX9, R5XYPP, A0A1C5UEA1, A0A1C5VKY6, A0A373TND6, A0A373ZH87, A0A3A6LQB7, A0A3R6LDH2, A0A3R6Q9G8, A0A416UYX1, A0A417RLU7, A7VHH9, R5KH97, A0A1C5WUP4, A0A412S816, A0A414EJM8, A0A414J1V2, A0A416AL58, D4LR64, A0A1C5Z209, A0A373ITL0, A0A396LSM2, A0A3R9ZVL7, A0A416P3D4, A0A416RGM2, R6HIU8, R7EGC2, A0A1C6E6X3, A0A1Q6S2G5, A0A2N0UPL9, A0A2N0UVB8, A0A2N0UWT2, A0A373KDC2, A0A373KRS1, A0A373L115, A0A373XV42, A0A373Y6T3, A0A374DJ59, A0A374DPM8, A0A374FSF0, A0A374N6H6, A0A3D3DA95, A0A412DXH9, A0A412LA28, A0A412UR07, A0A413KA69, A0A413QBW3, A0A414E3A9, R5D1T4, A0A1C6EQ01, R5P5H0, A0A1C6F990, A0A3D5L8Y9, A0A3D6AC38, A0A3R6SVD3, A0A1E7S0D7, A0A2A5TGG2, A0A415Z5J1, EGK13, A0A1E8RN23, A0A1E9DD49, A0A1F0FAD6, A0A233W8A3, A0A2I1L7D6, A0A3D1PND8, A0A3D2MD44, K1SKJ8, A0A1G9MW88, A0A1H8YW55, A0A1H5TMJ1, A0A1H7H8C5, A0A1I0CYE1, A0A1I5J214, A0A285S8J3, A0A1I3EIH6, A0A1I5B965, A0A358S5P3, A0A1I6H1H3, A0A1I6X5F7, A0A1J0A614, A0A1V4DE45, A0A374JIF2, A0A414XG04, A0A1L3KBE2, A0A2I1SDR0, A0A1N6DZY8, A0A3E0I476, A0A1Q6JXM9, A0A3D4DIX4, R7IT85, A0A1Q6KEA7, R6Z6D0, A0A1Q6L9Z5, A0A1Q6LC88, A0A1Q6LVH3, A0A417QMW9, R7JW99, A0A1Q6M696, A0A316SSC5, R6BF43, A0A1Q6QHQ1, A0A3D5TCY1, R5QRJ8, A0A1Q6R7Z7, A0A1Q6RHR6, A0A3D6BMM8, R6I2G4, A0A1Q6SNA2, R7R1N8, A0A1Q6T6A6, A0A1T4XPT4, A0A353BLV7, A0A3D4E0U7, A0A1V2UKY1, A0A242L160, A0A2K8TEW1, A0A2M9FQF2, A0A2S7RS71, V5XPI8, A0A1Y3S0C7, A0A1Y3XY06, A0A1Y4J0C3, A0A1Y4HQQR8, A0A242BTV8, A0A261EQB5, A0A2C9XR32, A0A2K9P2K8, A0A316PDG4, A0A2S7MEU9, A0A367CF70, A0A377KM70, A0A377L5M0, A0A2T3FKY8, A0A373ZV48, A0A396MR81, A0A396P3E8, A0A3R6I9R8, A0A3R6J169, A0A3R6J267, A0A3R6K6Q0, A0A3R6KHQ6, A0A3R6LPZ7, A0A3R6QUI1, A0A3R6QZQ1, A0A3R6S9G6, A0A3R6TNS1, A0A3R6TNA4, A0A3R6WLA3, A0A3R6XFM0, A0A416EZL8, A0A416MU44, A0A416Q5Q4, A0A417J1V1, A0A417NP17, A0A417VZ44, R7B0G8, A0A2U3ALG5, A0A2V2CGB5, A0A2V2DIC5, A0A2V2DK54, A0A2V2EC73, A0A2V2GM12, A0A2X2YEH4, A0A2X3IHM8, B1R9T6, Q5DWB7, A0A316LDC2, A0A316LWP8, A0A3D1YEF5, A0A3D2EKQ4, R7N5T0, A0A316PPR2, A0A316R4M9, A0A3D1VGT7, R6J1M9, A0A316RZZ6, A0A328SCZ6, A0A346NCZ8, A0A372KJY6, A0A348XVE3, A0A349EV83, A0A359BBU8, A0A350THC0, A0A3D2I4I9, A0A3D2YK18, A0A350XZ76, A0A351F7T6, A0A351F7Z1, A0A358X1Q9, A0A3D2QL94, A0A3D5TM38, R6IXZ0, A0A351TET6, A0A351V9K3, A0A352SJV4, R5VU70, A0A354CL32, R7B0W4, A0A354MC57, R6X4D0, A0A355KUA8, R5YDB2, R6DY54, A0A355L4J7, R6Q690, A0A355UZ84, A0A356PTA8, A0A3D5LNE6, R5MKG7, A0A357TN00, A0A367GE91, A0A3D2AM29, A0A358VEZ8, A0A373ZCG8, A0A396NB74, A0A3D4SA50, A0A3R6MH14, A0A3R6UVI9, A0A417PGY4, R5PDJ6, A0A358WG17, A0A366U9N1, A0A376H0L7, A0A449EYC5, CRZY42, G5IS96, A0A373BGR9, A0A3R6IUG4, A0A416FV15, A0A416KGT2, A0A416TQN3, A0A417IBR2, A0A417XNQ5, A0A373HJM3, E2NPB3, R7GPG2, A0A373VHN0, A0A417R9V7, A0A373VXU1, A0A416SZZ9, R5Z511, A0A374UNI7, A0A380CKK5, A0A3A9ACD3, A0A3A9EH28, A0A3A9EYD1, A0A3A9FYK0, A0A3A9GEV3, A0A3A9IXK2, A0A3B9B7N9, F7V542, A0A3C1N010, A0A3G9JMN8, A0A3C1XLK5, A0A3C2DUJ2, A0A3D1HC12, A0A3D1PLX3, R6P9K0, A0A3D2KH02, R5ELQ7, A0A3D2QYN7, A0A3D5NFD7, A0A3D4L2P3, R5LJW4, A0A3D4LSP0, A0A3R6N0H2, R6VVD6, A0A3E2XR62, D4JBB7, A0A3G3IHH8, M9SE00, R7Q237, A0A3G8V393, A0A3N0HX27, A0A3R7AW25, R5K0M8, A0A413RDG7, A0A413RVT9, A0A413T9R0, A0A414R4W0, A0A415L8W4, A5Z8Q9, A0A415FTF1, A0A416QBW4, B6FXH3, A0A416W0A8, R5L7W2, A0A417PS95, A0A429ZG70, A0A454GNP8, A0A454GNW0, U6S3L5, C6LHK8, KONS36, KONUS4, R5C989, R5MTH4, R5R1G0, R5XC26, R5ZJZ0, R6C9U5, R6MLY5, R6P546, R6QGL1, R6RWB1, R6UAF5, R6ZSF2, R7D2W4, R7I2P2, R7IMT7, R7KEG1, R7L5K0, R7LRG3, R7QYW0,

R9MQR6, S3FWL9, U5SBA8, A0A098LJX5, A0A0B1RN9X, A0A0V9UQP6, A0A1B2U963, A0A1X7L9F3, A0A225TQ16, A0A2X4WRG1, A0A379MOX4, A0A385HSQ6, A0A385L813, A0A419ZCZ1, A0A174B5B8, A0A1C6AZ63, A0A374ALM4, R7C2W1, A0A174S307, A0A1Q2CAU9, A0A1Q6NLV0, A0A415W1Y4, A0A415Y4A6, A0A417JP01, A0A417UTY8, B0P0X3, D4N0V8, E5VP64, LIQBVI, R5Z9B8, A0A1C5MIH1, A0A1C6E3T7, A0A3D1Q2K6, A0A416CS51, A0A417LJT5, R5HE76, A0A1C6FDU7, R7KX66, A0A1D9MHY5, A0A1H8EXQ4, A0A1H5LDI7, A0A1L7RLP9, A0A1M4S1Y0, A0A329XHA5, A0A1Q5PLJ3, A0A1Q6K9G3, A0A3D5WLX4, A0A3R6W5S1, A0A416J179, A0A417RRD5, R5SJZ7, A0A1Q6PYZ4, A0A3D2H1N0, A0A3D5IC39, R7II42, A0A1T4MTY8, A0A1Y3RL62, A0A1Y3RXG6, A0A1Y3XNP2, A0A1Y3ZZN0, A0A1Y4UL75, A0A1Y3S7Z5, A0A1Y3TWY2, A0A1Y4J4R2, A0A1Y4SXH8, A0A1Y4TT95, A0A2S0WQ29, A0A2T5AGQ5, A0A2W1Q8F0, A0A316NQV3, A0A328RY33, A0A350RPF7, D4RYK5, R5LBG5, A0A396KTW7, A0A3R6IKX1, A0A3A9D359, C8P9U7, R6YWE3, R7H1M9, A0A0H2Q3P4, A0A1Y4QZK8, A0A200I1H3, A0A366SH72, A0A366SM03, S1R0R2, A0A1B1V056, A0A1G9UKJ0, A0A1H0CUX7, A0A1H8JZY3, A0A1Y4SZX8, A0A2G0E7P6, A0A350IZ17, A0A369LEA8, A0A3N0IFM1, A0A3A9AW77, A0A3A9B2K7, A0A3D1SEU0, A0A3D1VB53, R5AYR9, A0A3D4CD14, R7BBY2, A0A3G9KAE3, K1RSL9, A0A096KTH7, A0A173YDY5, A0A174DD46, A0A174IV13, A0A2D1TV22, A0A374R084, A0A374RTC2, A0A374SZN8, A0A374TJF9, A0A374TQW5, A0A374TX60, A0A374U0B1, A0A374U8J8, A0A374UCR5, A0A374UH49, A0A374V392, A0A374VJF1, A0A374W1U8, A0A374WZR0, A0A381K172, A0A395Y8X4, A0A395ZST8, A0A396A768, A0A396CG32, A0A396CYS8, A0A396FC13, A0A3C1CZP4, A0A3D1WTZ7, A0A3G8UCI3, A0A412ARN9, A0A412HMA1, A0A412HNF2, A0A412LKF5, A0A412N4W2, A0A412P0B4, A0A412SZL7, A0A412UFJ7, A0A412XM31, A0A413CNY8, A0A413DVU1, A0A413F4J6, A0A413FWN0, A0A413H648, A0A413RE42, A0A413TJB1, A0A413UK02, A0A413UMT9, A0A414C986, A0A414CK85, A0A414EVH2, A0A414JG38, A0A414Q1R9, A0A414RV10, A0A414VMJ3, A0A414WKS3, A0A414ZUN0, A0A415BNJ7, A0A415CBZ1, A0A415CXQ6, A0A415I701, A0A415JJV0, A0A415KSR4, A0A415RSF4, A0A415UX05, A0A415VBA0, R6A2J0, A0A0R1ZIP7, A0A0R2HBP8, A0A1H2W4E6, A0A120DHQ5, A0A1B1V067, A0A1C8YZ69, A0A1C8YZ72, A0A1G7KF16, A0A1X7C254, A0A2T5N7M9, A0A1Y4CJ66, A0A1Y4DIS5, A0A1Y4K132, A0A316RUR1, A0A380LLX8, A0A3E3E3J4, W1URS6, A0A0R2BYW1, A0A100YXG3, A0A110B1R2, A0A1K1TCY8, A0A412JIU0, A0A1B1V057, A0A1C8YZ67, A0A1C8YZ68, A0A1Q6M5M7, A0A3D4MJ99, A0A1S9BZY5, A0A1Y3XTF7, A0A1Y4AFN6, A0A1Y4BH00, A0A356G6I3, K8ZQD3, Q75N78, K8Z9V7, A0A1B1V061, A0A1Q6QKT9, A0A1Y3TDY5, A0A1Y4R5I5, A0A1Y4SEA8, A0A1Y4WFJ0, A0A2N6QW12, A0A3A6DGF8, A0A3E2VXT7, A0A3R6YBJ2, E2SGJ9, G1VWA4, N9WA14, A0A3N0AFJ1, A0A083WXZ9, A0A083XU14, A0A083XWJ0, A0A087AZ12, A0A087BL81, A0A0A0UBK2, A0A0A1GNM5, A0A0L0LT95, A0A0L7AX86, A0A0L7BQE9, A0A0L7C7L3, A0A0L7C7W4, A0A0M3TJT0, A0A0M4MFZ9, A0A1S2VZD6, A0A1V8QI34, A0A2K9B3X8, A0A2K9BKC3, A0A2N0SQS3, A0A2N0TK04, A0A2N6TU17, A0A2U2RQ89, A0A2X1AGE8, A0A3D8U3A8, A0A3G8W691, B3DS63, B7GRV6, C5EAY9, D6ZU57, E8MTI6, F8AQK2, F9Y078, I3BGR9, Q8G653, Q9KK62, R5MWY7, R6GL06, S3AFR8, T2I0T0, V6XYC7, W6F900, A0A087BA02, A0A0R1Z9U8, A0A2A2X8Y4, C7AQY5, A0A354CQT0, A0A369LHG2, A0A369NWX7, A0A369P3E3, A0A3E2ESB4, A0A3E2FDC0, A0A3N0ASM9, A0A418URI5, R9KZ34, A0A072MTF9, A0A087B9E5, A0A0A7I2N8, A0A0H2P5E0, A0A0H2PPK4, A0A0H3ECC2, A0A0M4LY42, A0A133KJX4, A0A139B8E5, A0A1V8PQD5, A0A267WJZ0, A0A286TEZ2, A0A292G630, A0A2G5PSG3, A0A2G5Q2N3, B6XTV6, C0BTD8, E3EM77, I3WHT4, K2HTC3, K2MHZ8, Q2PQC1, Q6J263, Q6J264, Q6R974, R6GG38, R6NWT0, A0A076JM3, A0A087D2Y1, A0A087DS98, A0A173WIA0, A0A1E7Y0H6, A0A1X2YWE2, A0A1X2YWW9, A0A1X3A1P5, A0A3D1TMB3, A0A412KD51, A1A1Q4, E4V9F1, Q2PQC2, Q5ZUN2, R5GZN8, A0A086ZMK5, A0A087DXT8, A0A087E3B7, A0A087EGX6, A0A261F1D3, A0A2N3QN60, M4RES1, A0A087QBK2, A0A0R2D5Y9, A0A133PBE1, A0A137PJZ3, A0A1V3Y354, A0A1Z1NAC5, A0A249NMX6, A0A256LDW7, A0A256MFB7, A0A267MDW7, A0A2M9NJ88, A0A2M9WPQ8, A0A2Z6PSU9, A0A346MTG1, A0A355X2R0, A0A366KK12, A0A3A9D8U5, A0A3G2JXD4, A0A448F0U1, A5HKP3, C2E3X0, D0R2U6, D1YK19, F4ADE7, I7L5X3, P97038, Q74LX7, Q9ZG02, V5P0L8, A0A0R1NW63, A0A0R1XTL5, N2A9Z3, A0A172RX76, A0A1D2WV04, A0A2H4U7U5, A5ULW3, B9AEX3, D2ZPP5, R7PXN8, A0A1T4NUK7, A0A3C1CX18, A0A1V8Q401, D2QAA6, W2VC17, W4N8T0, A0A2N5KYJ7, A0A2V2E7P6, A0A316NZH6, A0A351XLF0, A0A354LTC4, A0A374QMH3, A0A395WCM1, A0A3D4J9S9, A0A412HWV0, A0A412J0P3, A0A413CU78, A0A413UCK0, A0A414J8H8, B7CE40, A0A3D1ZQ84, C7AQW5, Q1WR93, C7H2N9, I3B7M4, A0A078MKA5, A0A087BIP3, A0A0H2KQR3, A0A161ZF19, A0A1Y0HUT7, A0A0P7HNU7, A0A0Q9CD43, A0A163QX20, A0A0R1YCB4, A0A179C596, A0A1G6IER0, A0A1H1KU96, A0A1I3ZEL6, A0A1N6NMR2, A0A1W6DL08, U1Z025, A0A316Q414, R7AD75, A0A350TY88, A0A352UQD1, A0A396NKX6, A0A401LCP1, R5AKL1, A0A3E0VQ29, A0A425VYT0, A0A430FT18, A0A430JVA6, C7N5S0, D1NSI6, R5WSF6, A0A087AFR3, A0A2A2EH82, A0A2N5J211, A0A430FAS4, A0A087B4P4, A0A0A7I7Q6, A0A248X6D7, A0A2N3QTB1, A0A2N3R2F0, A0A395XEC0, A0A3A9ABH0, A0A0J6DGR3, A0A126SVX1, C4FEW7, A0A1C7FXR9, A0A315S394, B8DUI5, G0YYC2, Q53CP8, A0A1U7P4L8, A0A2A2EEP4, A0A2N3QJ23, A0A2N3QV65, A0A2N3R415, A0A2V2CMM9, A0A3E4QZA8, G1WLB3, A0A414NEJ3, A0A1Y3WRB7, A0A1Z7M8U3, A0A417TDM7, A0A0R2BEH4, A0A2Z4VXL4, A0A399M1V5, N1ZR12, A0A1Y4B457, R6YY67, A0A176U8F3, A0A3C0X2V9, A0A3D1HUK8, B5TQZ0, A0A369L9C2, A0A415XKM6, A0A449DT74, A4E835, A0A0R1ZQV3, U2Q7T9, A0A1Y4BTH4, A0A1Y4DUE1, A0A0R1XP40, A0A132ZAG9, F4BQ61, A0A1B1V035, A0A1Y3JFW2, U2CE73, A0A350WBU4, A0A3P6NBD8, T4J9K1, A0A2W4FI41.

Uniprot ID in Cluster 3:

A0A015QRT5, A0A380YYT7, K1FVV7, A0A069IAG7, A0A194AJ02, A0A225NT33, A0A1F8J3B4, A0A3D8IU12, A0A3M6T8P4, A0A3M6UPQ0, A0A2B4RLB4, G8PLZ0, A0A370LC31, A0A2W6ZMH7, A0A1C3E8F4, D5SR69, A0A2U0HCZ6, A0A411PGK6, A0A1G1MAA6, A0A2N2F6K9, A0A3N6PLV0, C0G794, C4ISE4, A0A150AKM5, G8PKQ8, A0A1G0IK36, A0A0B1TVZ7, A0A090D114, A0A0H3ATW9, A0A126QJP9, A0A2E4BL23, A0A1V6AVA7, A0A2N2LUQ6, A0A261SCF5, A0A316PJ01, A0A1F8JSQ4, A0A1G0HAQ1, A0A3R2BRM1, A0A1B1G0N2, A0A2B4RYU3, A0A0C1E4X5, A0A2E3RC88, A0A1E3W7L2, A0A2M8JT86, A0A421CN13, R6TB33, S0F7R8, A0A0W0VHU4, A0A1G5G640, A0A1J1LLM3, A0A1V4X7D0, NIJPE9, A0A2J7TE83, A0A357PS89, A0A0J1BIH9, A0A0S1XYI7, A0A3B8VZ38, A3J138, A0A1F9PQG5, A0A1Y4DFR1,



A0A2A2QTH7, A0A2N7DDQ8, A0A2N7FJ57, A0A3Q9E717, D6LPE2, D7GZI6, A0A3D3RE49, A0A0W8G527, A0A1I7BRB4, A0A3E1EHH9, A0A414M9L3, A0A415S0V2, E5WUX4, R5JKQ3, A0A0A8K1U8, A0A1J0P8Z9, A0A1Q3GY01, A0A1L9GKI4, A0A2D8B7B4, A0A2D9ETL4, A0A2E4R3A3, A0A368X1H2, A0A3A1YZD5, A0A366ABI8, SOG2D5, A0A150AJX9, A0A1E3VNV6, A0A1J4XHB8, A0A1Z9QGP4, A0A2D6YV9, A0A2W4UU07, A0A2D5A707, A0A2D5IPY9, A0A354JX62, A0A0Q9IHC0, A0A161UY73, A0A168DPJ1, A0A161V6V2, A0A1B1FTP5, A0A1C5R3D1, A0A1H1HZU9, A0A1H6BZA9, A0A1I7DPW8, B6R6S3, A0A1V4MN11, A0A2K8V8T9, A0A2M9RQ07, A0A2U1CPN3, A0A327KEQ9, A0A327KX38, A0A353YH78, A0A1M5QRC6, A3Z7E1, A0A259PFS4, A6LC91, D7ISX3, C4XQL9, K2BWW7, A0A0N7LRH4, A0A109BLN5, A0A250JZR3, F8C7S7, A0A254VI51, A0A1J0D759, A4SZ76, A0A2G2DUU1, A0A2P8FET3, A0A3D2DT85, E1QI79, A0A3C1P0Q0, A0A084T4T8, A0A1J4QW89, A0A2C9PDP9, A0A2S9ZFM3, A0A3G4VG17, A6D0Z2, A0A1E3VQ72, A0A240ENI4, A0A2D5UHL0, A0A348G277, A0A3D4GK23, A0A432SVE6, A0A433J08, A6Q9B4, B0TS31, E2PS30, A0A066ZNB2, A0A0G0V5P0, A0A0P1ED03, A0A0P1E177, A0A124GCA4, A0A126QPR6, A0A1E2S0P7, A0A1E4DHz7, A0A1G1J1Z6, A0A1Q8QCG7, A0A1R3FN38, A0A1V3YVF5, A0A1Z8MQ52, A0A1Z8MZW0, N1JWV3, A0A366E964, A0A3D9YZT9, A0A3A8QP3, A0A424KID6, A0A3D3B2U1, A0A443YTU0, A0A3D6B224, I4G4Y2, K6H9H5, Q6AP13, A0A090CYN3, A0A0N0GQD4, A0A126V201, A0A1A9FM06, A0A256FGX7, A0A2S8YF29, A0A404HEB8, A0A1E2S0N5, A0A024FL42, A0A1G5H7R3, A0A454CY74, A0A1X4J0U9, A0A254VJP5, A0A1F4U669, A0A258IRF8, A0A259A381, A0A259KW13, A0A1M5R266, A0A2T3N9I6, A0A2W2B8Q4, A0A2W5SP95, A0A317L6K1, A0A327JML9, A0A378KRC8, A0A2W7AQD0, A0A3A8HRW3, A0A3A8J7P5, A0A3A8KHL5, A0A410RKK6, H8MIV5, E1JZM7, S7U4S0, A0A011UQH5, A0A137XR24, A0A1J63R2, A0A2S8U6H0, A0A3N0B8M8, A6WZL5, A0A0C1GCC2, A0A0U5BZJ9, A0A0W0Z3B0, A0A165TV46, A0A1G6EGK4, A0A1I3SYD8, A0A1J5MR94, A0A1M3MMD4, A0A3A8JEU4, A0A3A8LN48, A0A3A8LFT9, A0A3A8PYB4, A0A1R0HGA2, A0A3A8NRA6, A0A259DDA1, A0A259FQ56, A0A2D8Q557, A0A2G2MCT6, A0A2N2HPC9, A0A2S7U3E6, A0A2W2CBK9, A0A3C0BRZ6, A0A3L7RC06, G8HT95, A0A081KA94, A0A127CG94, A0A2D8K337, A0A221AGM8, A0A329BX43, A0A1G0GRA3, A0A2K4MLB4, A0A2S9X0T2, A0A2E0UHP1, A0A2E9GQP5, A0A2N2GCZ0, A0A2N2MR93, A0A2N2KKF3, A0A3C1DL41, A0A2T0RGG8, A0A2T4WHA7, A0A3B1C3K0, K2C9K2, A0A0F7BQM8, A0A1I0LKP4, A0A098G7Z1, A0A0D2JRL6, A0A0E1X5J8, A0A0F6ARN7, A0A0M1WBD3, A0A0U5MKJ5, A0A1G4F2S6, A0A1M4LC47, A0A1P8S6Z5, A0A1Z1ZPB8, A0A2D2BSB7, A0A381B8K5, A9M6D4, B0CHQ3, COREA5, D0RIW3, D1CWB8, N8LWM3, Q57C43, Q8Y1A2, A0A0P1EZA6, A0A346SH27, A0A0W0TEQ5, A0A1E9J462, A0A3S4TK84, C6JK09, A0A1G0FFL7, A0A1G0J5G1, K2C0T8, A0A1Q3SM74, A0A2G4WRU9, A0A2T3KQY6, A0A1U9Z1F9, A0A2E1BBA0, A0A250LXV9, A0A2H5DYS7, A0A252ZJL0, A0A258K8U3, A0A258M3N7, A0A259CC98, A0A259JW15, A0A2J7TL8, B8EIV4, A0A2K8VDR6, A0A2N7HFS3, A0A2P1S4H7, H1PV15, A0A2R4XLY8, L7UMA8, A0A2U1SVW2, A0A3D3EFW5, A0A412GPE4, B3JPN4, R5MFF4, R6CMS0, R6MC22, U5E834, A0A0A0D111, A0A412U355, F3QWK3, G5SQQ1, R5NK65, A0A431IHT2, A0A448TS98, E6WYT9, F0QZN0, A0A0M9F864, G9ETT6, A0A0W0U4T3, A0A1F8JL49, A0A1F8JY45, A0A117MVE7, A0A1E4DJZ7, A0A151FFU4, A0A1S1X3W1, A0A1F7WG96, A0A352M740, A0A1G3V499, A0A1N7BSS0, A0A1T4WZ87, A0A1W6HU92, A0A1W9KRU8, A0A212K556, A0A2D5UMA1, A0A2E0X8Y0, A0A2P8CZF7, A0A353D432, A0A378HYK5, A0A3S0YTU6, A0A414Q275, C3WBP2, B2IKP7, C7XAE9, D0TAT1, J6UDJ5, A0A1I0GK03, K1J2J2, A0A085FVY4, A0A1E1UYP0, A0A0E0U7N9, A0A3A6SEI5, B6ICQ0, A0A0E3ZL79, A0A2N5QTY3, A0A2R2J0Y5, A0A0Q0W6D1, A0A0W0VKJ4, A0A0W0Z9P1, A0A151CGY1, A0A1A8T2N9, A0A1M6DAB1, A0A1N6E7M4, A0A1W1C662, A6QD30, A0A240DZJ7, A0A2E7KK99, A0A2I5TM91, A0A2V5G976, A0A2Z4JA9A, A0A2Z4JUA4, A0A330FVN0, A0A1H7ZY72, A0A3D4GM21, A0A3R2BRL0, C4XH55, K6FJY8, A0A0W0Z462, A0A177P3V0, Q09DR6, A0A1G0GJ98, A0A1G0GYM1, A0A1V5FSF5, A0A1W1EFZ0, A0A344W2F7, A0A2D5UHH2, A0A2E2CC20, A0A350KFF9, A0A355GG87, A0A3C0ANS1, A6CBH1, A0A2W7A713, A0A2W7AVS9, F8L9Q7, R5I1X7, V4J2A4, A0A061PTL9, A0A0C1WC20, A0A0D0IEI6, A0A1P8ME02, A0A1Q1P9X6, A0A2A2N1M7, A0A2I8XFA6, A0A2N7MZV8, A0A2S7UJ02, A0A2U4G0H4, A0A380QIY1, A0A3A1PUC6, A0A3G2PVW3, A0A454BB04, A7MVS3, D0XH92, K5UUX5, A0A0D5LVV1, A0A1G8DLS8, A0A0S4LMA2, A0A1C5NOR1, A0A228IIT7, A0A3G3HED0, Q398T1, A0A1T4P8D1, A0A1V1VGF9, A0A1X9U6J1, A0A2S2CIW7, A0A2T3ICR9, A0A2T3QJ17, D0Z3X3, A0A1W1B8D5, A0A1Y4A9U9, A0A2N2K6U9, A0A2V5SXM4, A0A2V6L512, A0A347UQG3, A0A3A2I316, A0A3N2DK01, A0A405A9M6, A0A416G9R9, F9RY84, R6FQG9, R7PBA0, U7VBV0, A0A0C2NXD9, A0A1B1NN49, A0A1E3WPK6, F9RFC4, F9RMK2, A0A0D8LMS3, A0A2T3QE11, Q1ZVH6, A0A0J1GGH4, A0A0J1JN19, A0A0N1J3D7, A0A124FYB5, A0A1358B1, A0A1T4V718, A0A1B9NWJ9, A0A1B9PH90, A0A1E5AVQ5, B5ET15, Q5E0Y5, A0A1C2BYD4, A0A1F4TJC9, A0A1Q6FJM3, A0A1Y3YYW1, A0A1Y4JTL7, A0A412N988, A0A412YPP0, A0A1U7L869, A0A1Y3VSR9, A0A373UT91, A0A413ITN4, A0A415QJ25, A0A1X7DZF7, A0A1Y4DBH8, A0A2G4WUG6, A0A2K7SZK1, A0A2S2CGX5, A0A2T3IA95, A0A2T3QJW6, D0Z2I7, A0A2S7X6W5, I2F1X7, A0A377GXT7, A0A3D8J145, A0A3L8ADQ1, R6DCR3, A0A3Q0NR94, A0A432T9W4, B1KFA3, Q2BX03, A0A090PDV4, A0A3N3DXT4, A0A0B7JEI1, A0A1T4URF0, A0A1Y6KZ16, A0A1Y6MFW5, A0A1Y6MN24, A0A2T3HWE1, A0A2T3IHX1, A0A2T3KB76, A0A2T3QX18, A0A0D8LG68, A0A0M9FCL1, , A0A2S7V125, A0A2T3KSW0, A0A2T3LHM2, A0A2T3LWA6, A0A2T3M4A1, A0A2T3Q8G3, Q1ZTG2, V5F3W3, A0A0H5DPH0, A0A0W0UL17, A0A1I3YXN0, A0A1M3CSS2, A0A1M5BIL1, A0A1Q6HNS0, R5Q2M4, A0A1Q9HJ44, A0A0H3G8C6, C7LD61, Q2YS20, A0A2H0VTZ6, A0A2H9SW27, A0A380YPD2, A0A3A5ALI0, A0A3A6QV14, A0A3D6E9F2, R5YLC3, A0A3D8J994, A4A1Q4, A8SZM3, B5D243, R5V843, R5BIM3, R5S0K4, R6T8B0, R6YK38, R5CT35, R5LP13, R6YMZ8, R7D329, U1XJ12, A0A1X7H4Q5, A0A256CS38, , A0A2U2AIG6, A0A0B0BUY0, A0A1Q6E5Z9, A0A3B9CNC3, R5WRQ4, A0A0F5JPH2, A0A0J6FGN8, K5ZUZ7, S0GIE7, A0A0Q9YPT2, A0A1B9PG67, A0A1C5P8A5, R6ZVJ7, A0A1C7H271, A0A1G6G3R2, A0A3A9BD49, A0A413V0A4, A0A1M3L7G3, F8X4H3, A0A1Q6F953, A0A1Y4I5C3, A0A1Q6FTM2, A0A1Q6HHW4, A0A1Y3WWC2, A0A1Y4DTK9, A0A1Y4FOX2, A0A1Y4JA18, R5UJA6, A0A1Y4AKB3, A0A1Y4HQH8, A0A255T6N5, A0A255TEE4, A0A351YFB0, A0A353WPN1, R5BQI6, A0A3D2Q5L5, Q5LF84, A0A0B1TYT9, A0A1Q8QSN8, A0A3E4KT54, A0A414ZEK3, A0A415AQH4, A0A415NEN9, B3CDZ0, A0A416VQV8, A0A416XAJ9, K0X7X3, R5F358, F5IZW5, I9SXL6, R5JHZ2, R5CDE7, R5CER5, R5SNC6, R5GM31, R6E0J4, R7J4D2, A0A015R0Q2, A0A412WWD2, C6IN63, D7I9N9, D7J6Y2, A0A015VA14, A0A015XJ16, A0A015LYL0, A0A016GBF0, A0A017P282, A0A0E2AL36, A0A0E2RQA6, A0A0E2SW01, A0A0E2TCX5,

A0A149N7X8, I9KEZ1, A0A069S9I0, A0A076IM21, A0A078R9T9, A0A0M1W295, A0A0P0M2Y4, A0A174V343, A0A1H7FFJ4, A0A1Q6JHD0, A0A1Y3ZX93, A0A372Y5D4, A0A396AR73, A0A3ASSZQ8, A0A3A5X0E7, A0A3A6A5C4, A0A3A6LZX5, A0A412UA40, A0A413M1Q6, A0A414XW17, A0A415BSP8, B6W2X6, C3R5L0, C6ZB57, D1JYA6, D4V9V0, ESUWB5, I9J9I0, I9RBB0, I9REE0, R9HMN5, R9I9X1, A0A090DWL1, A0A0M0MUE8, A0A139L105, A0A1F0IUE8, A0A1Y4V9V3, A0A1Y4VE99, A0A372YWI5, A0A373GIT5, A0A395VQZ1, A0A3A5T4M3, A0A3A6MF15, A0A3E4N8F8, A0A3E5HIII, A0A412IKT9, A0A412ZQU0, A0A414E681, A0A414G425, A0A415I154, A0A415KQI2, A7LYY3, C3R2Q0, D0TQ81, D4VSU1, D4WDG3, D6D837, D7J863, D7K5F7, A0A174WER9, A0A1I4QC00, A0A3E5BJW5, A0A3E5CPN4, I8XP66, A0A1Q6F3Y7, A0A356I4P7, B0MU84, R7JJ32, A0A1T4MBU3, A0A1Y0MD53, A0A1Y4C8W2, A0A2H9SH64, A0A2K1SSX7, A0A2T7N9Y7, A0A328IS42, A0A2V2FKR7, A0A365XU37, A0A374VCV0, A0A412SGP4, G5H759, A0A412SLD3, G5HAC3, A0A413T4X6, A0A421CL08, K2EES3, A0A015P975, R6VGS0, W0ER67, A0A069SA94, A0A073I8U2, A0A078T359, A0A173SDD1, A0A173YCN2, A0A174RKZ4, A0A174X6C4, A0A223HUT6, A0A395Z2Z6, A0A3D9A4X9, A0A3E4MPG5, A0A3E4P4V5, A0A3L7ZIU3, A0A3L7ZM81, A0A3R5ZKQ7, A0A3R6BBV3, A0A3R6JFN2, K6AGG9, A0A0G0CSK5, A0A0W8FKY6, A0A1J5MTK4, , A0A1Q6GIH3, A0A1Y3WVNH0, A0A1Y4GUD1, A0A355IEA2, A0A356DK99, A0A412TMM9, R5NT58, A0A3D2VKH5, A0A3P6M7S9, A0A410P2V0, HIDEH8, R5VHV7, A0A0B2JNC3, A0A1Q6FXM6, A0A248UJQ5, A0A256GT25, A0A256FD56, A0A316R384, A0A396N1N9, A0A3R6IB08, G9S0Q6, R7DH15, A0A373J132, U6RFW2, A0A397WKZ7, A6L3T7, A0A3D2BE86, A0A3D3YKJ6, A0A421C9L3, E4MA75, R5KIN4, R7KQF4, A0A078Q2R6, A0A078QJ8, A0A0J9FAB4, A0A174F9J2, A0A1H4BRB9, A0A1I4ZT87, C3QKE2, F7M051, I9JDX3, I9SID3, R6JEW4, A0A0S7Y1E1, A0A1G7A0Y0, Q1D1B9, A0A1W6ZXR9, A0A256H0S5, A0A0F0FLY3, A0A1F8JMW5, A0A1Q6GGZ8, A0A3C0E6D3, A0A3E4W691, A0A3E4Z5Y0, A0A414FMU4, A0A414RG89, A0A414X7B5, A0A1Y3VAE9, A0A1Y3X9P8, A0A1Y4U729, A0A359G4W0, A0A454DG09, R5IBK3, A0A0UIH8L8, A0A0W0R5D0, A0A2H0VR73, A0A3D5HZ82, C4WP69, F8KW10, A0A1Y2LC91, A0A2M9RVG8, A0A2M9SDQ5, M5JCS5, U1XNA7, A0A2S7TMB8, A0A0W0XJBI, A0A378L2M6, W0BH55, A0A2N5Y9A0, A0A162K0G5, A0A2D5IYZ2, A0A349DFE0, A0A3C1P0W4, I3YMA4, R5VA45.

Uniprot ID in Cluster 4:

, A0A1Y4WHR5, A0A3E3E2L1, B1CAB2, C6LFD9, R6BJ89, D1Y0X1, A0A168HQB1, A0A1Y4S3F9, A0A1Y4RPW8, A0A174HZN5, A0A1C6JAH3, A0A2N0K709, E7GMP4, G5FJ32, U2C8A8, A0A3N5YA45, A0A1C5VJA2, A0A1C6JF9, U2QQR8, A0A1U7NM00, A0A1Y3YAM0, A0A1Y4UG66, A0A168HZJ4, A0A1I6L3W4, D5RE44, F7L3P9, A0A1A7T8Z9, A0A1L8WZ04, R2RHT8, A0A1I3QLN3, A0A3A8Y7G4, A0A407BWQ4, U2NJL6, R6CP37, A0A1I0RUB1, A0A2P2F5B8, A0A372SS51, A0A417K4I3, A0A3A9J092, R9LRN3, R2P888, S3JNM0, A0A174EAC0, A0A174FV32, A0A291TD80, A0A329TDH2, A0A373N844, A0A374GBR5, A0A3A6GS70, A0A412BPR9, A0A413B5M6, A0A415WFJ7, A0A415Y0W8, A0A416F798, A0A416RRC8, A0A417BS22, A0A417DHJ0, A0A417GU82, A0A417H0T3, A0A417KNH2, A0A417MA27, A7AZP3, B6FMZ6, C9L7H6, F7KVVW8, A0A1F8V839, A0A1Y3TDI7, A0A1Y4IW60, A0A1Y4T181, A0A0B3W0C1, A0A150Y9V1, A0A174M219, A0A1Y4MKL7, B0PEQ1, A0A1E7RZY0, A0A1I5HL45, A0A317RRD1, E3GLV8, A0A1I5E9Q9, A0A1Y3SSY2, A0A1Y4B1Y9, A0A1Y4V1R6, A0A1Y4F3X7, A0A1Y4SZE1, A0A2N8PW60, A0A437UPK3, S0L3A8, A0A352A4F5, A0A352IGV5, A0A3A8W6M3, A0A410Q6B2, D9R5S5, F6DQB5, G4KTY7, R2SG58, A0A0G4K934, A0A2K9JDT8, A0A3B6VFI2, A0A3B6W6C7, G0EKB0, A0A1E5NA28, A0A1E5NLD7, A0A2U4FDF6, A0A1M5TCH3, A0A1V4AK24, A0A1Y4QH48, A0A1Y4SID1, A0A1Y4WR63, A0A316MKN8, A0A372YM13, A0A396L3D7, A0A3R6K7I0, R7A142, A0A0A2HJ28, A0A0M0A3Y7, A0A175M729, A0A2G7HG23, A0A2I4NDF2, A0A396TNR4, A0A433YSF3, A0A433ZGM8, A5I437, A7GFL0, B1IHH9, B1KW19, C1FR46, A0A0E2HMK6, A0A1Y4MZM2, A0A1Y4QAU0, A0A265QC44, A0A2N5RIV1, A0A381AFX2, A0A3B6VNW2, D8IBX4, J9US21, K0JLW2, F0Z3H5, A0A1I0DC69, A0A1I0IXX3, A0A2T3FGN3, A0A3R6RY08, A0A413FI26, C0CWN7, A0A3A6DDY6, E2SNE7, A0A3E3AEZ7, B0N5K0, G9R2C1, H1AJI3, A0A1H8APX7, A0A139TJZ7, A0A101K511, A0A1E9ESR3, A0A2C6AWF9, A0A2G7H9I6, A0A3P1UQK0, Q8RH78, U7T3L1, A0A412FQ65, B9Y580, A0A2P8QZ24, D5U989, A0A1V6BY61, A0A0E2E361, A0A0F6MLJ4, M2BCU1, M2C0V7, M2SL56, Q73QE4, A0A2A4IQ57, A0A090HX48, A0A1U7M0M4, A0A211MBW2, A0A3E5FPS6, N1ZIN8.

Uniprot ID in Cluster 5:

A0A222WIS1, A0A231Q8X5, A0A2I2AAP9, A0A0R1W160, A0A2A7R2Y1, A0A2N6QYN7, A0A0R1UWQ5, A0A1Z5IQW1, A0A1Z5IT93, A0A1Z5IB66, A0A1Z5H4U0, A0A353JQW4, Q04G99, A0A0R2K0X3, A0A1K1KME9, A0A1W7QML9, A0A1Z5H3M3, A0A0R2JHY1, A0A0R2D4D0, A0A1K2I5D6, A0A0R2FWA4, A0A0R1NQ49, A0A0R2CV20, A0A0R2BHN8, A0A166GR95, A0A0R1YPH8, A0A0R1TGH4, A0A1B2IZ20, A0A0R1S6Y7, A0A3R8GDJ9, A0A0R1QC93, A0A0R1JL4, A0A0R1SML7, A0A0R1ZFT3, A0A1E7XIP2, A0A1X1FGX5, A0A269YBQ1, F4FRT3, J9VZ15, A0A0B8QU93, A0A0H1RML1, A0A0V8AW21, A0A0V8B2Q5, A0A0V8B632, A0A0V8BWL4, A0A0V8C033, A0A0V8CP19, A0A0V8DMM6, A0A0V8EMS6, A0A199YU54, A0A2A5S1X6, A0A2A9I5I9, A0A2A9I864, A0A2A9IPR4, A0A2N5WFR0, A0A2X0QY89, A0A2Z3KJD1, A0A3B0GVV8, A0A3S3PBD4, A0A418ZNB4, D2BQN6, G6FER9, H5SYX1, Q9CGG1, S6FT47, U6EMP4, A0A0R1LFP3, A0A1L6RA67, A0A370VDK2, C5R7S2, G0UE95, A0A1C4AU17, A0A1C4AW71, V6DNE3, A0A0R1W6E5, G9WFG4, A0A0R2L3S7, A0A3T0TRS0, A0A1D7ZWZ7, A0A3R8NQ73, C0WNR6, C0XK02, C2CZV7, A0A0R2FEJ7, A0A0R2DUK2, A0A0R2DHB8, A0A0R1Y3T2, A0A2J6NM40, A0A0R1XIF1, A0A0R1WBV8, A0A142KNV5, C8P624, E3C988, A0A0R1TED1, A0A0R1MHE4, A0A0R2L8C7, A0A0R1YX04, A0A0R1UGB4, A0A0R1RG26, A0A349MW92, A0A0R1REZ5, A0A0R1LM52, A0A0R2LW04, A0A0R1LLQ6, A0A0R1N3G8, A0A1Y6K0J1, A0A0R1GSH6, A0A0R1UJP1, A0A0N7CJS4, A0A0R2F0E8, A0A142KSS3, A0A158SJJ3, A0A1L7GUZ0, A0A1Q2T2B2, A0A2M8LLR3, A0A2M8MS02, A0A3G3EA23, A0A3R5YJH3, B2GEX5, C0VWV7, D0DS8, H6WSA2, A0A0F3RPC0, A0A0R1IYJ5, A0A0R1R093, A0A2T4XMH6, A0A0D1A7E7, X0PAU0, A0A0A7U1U9, A0A0C1M217, A0A0D0GW77, A0A2Z3R9V4, A0A378HJU3, Q03PK6, A0A0R2EBE4, A0A0A1GWR1, V7HYM9, S4NKA1, A0A089RUH0, A0A0F7PT45, A0A1D7TTE4, A0A1V9R3H9, A0A1V9RZD3, A0A1V9SZ63, A0A1Y3S2B1, A0A2A7QRU1, A0A2A7RF40, A0A2U2MAJ3, A0A414NCD2, C2EEL1, F5VED8, F7QW20, H7FXF8, J7GY78, Q1WUK8,

A0A269YLE8, A0A1S2S4N4, A0A3S7H4F1, A0N1JL4, A0A401IRR1, D3L852, A0A401FIN5, A0A0R2AHN0, A0A0R1NI96, A0A0R1HY12, A0A0R2D584, A0A3B8EC56, A0A084A9C1, A0A0M2ZS45, A0A166JQB6, A0A167A8I9, A0A1E7G3M6, A0A2A5SW08, A2RL39, T0S7H1, T2F5W1, A0A0R2A2U2, A0A3R8NMQ4, A0A0R1ZXW0, G9ZLM6, C2EUV5, A0A1S6QGU7, A0A0R1M9Z2, A0A166UAX6, A0A081BHX2, A0A0R2CS06, A0A0R1P6T7, A0A2V1MZX7, A0A0R1L3E0, M5AG79, U2PAE9, A0A3Q8CKN1.

Uniprot ID in Cluster 6:

A0A1B1V047, C8P4G7, A0A0R2L384, A0A1B1V051, A0A142KQ61, E3C9N7, A0A0R1J9I3, A0A0R1S5M0, G9ZNN2, A0A0R2FM49, A0A0R1NZ86, H1LJV8, A0A2S3U707, A0A1Z5J2X9, A0A353JTZ7, A0A1Z5IPB1, A0A1Z5IWG5, A0A1Z5II34, A0A1Z5I9N9, A0A0R1Y4S5, A0A2N6QYX1, A0A2J6NLW7, A0A2A7R2I6, A0A0R1RVG8, A0A0R1UZ28, A0A0R1HMR8, A0A0R2GE40, A0A0R1R9D4, A0A0R2LCQ7, A0A0R2DGB1, A0A0R1U395, A0A0R2H586, A0A0R1LH18, A0A0R1GYV4, A0A0R1LIZ4, A0A0R1T7E4, A0A1B2IW15, A0A0R1VHX1, H4GJG0, X0PU81, A0A0D4CK65, A0A0R1NZY1, A0A1G9Z633, A0A1B1V059, A0A3C1H6J5, A0A0N7CLM2, A0A142KUJ8, A0A158SK60, A0A1D7ZZG2, A0A1L7GXS2, A0A1Q2T502, A0A2K2TJ27, A0A2M8MSG5, A0A2N8Z4E6, A0A2S7G955, A0A3R5UF34, A0A3R5ZVE4, B2GC95, C0WYM0, D0DR69, F2VY22, K4MKH0, T0TR70, A0A0D1A849, A0A1B1V053, A0A0A1GR04, A0A269Y025, J9WAD5, A0A1E7XBQ8, A0A0R1Z2A3, A0A1X1FF38, A0A0R1SU38, A0A0R1ZH3, A0A269YHL7, F4FU47, S4ND32, X0P9D4, A0A425XRC0, C0WRH8, C0XH56, C2D2T0, A0A1B1V060, A0A0R1YRF7, A0A0R1S8T2, A0A425WZ09, A0A0R1N706, A0A401FM67, A0A1S6QIH8, A0A0R1W440, A0A349MWC6, A0A1B1V054, A0A3R8KN58, A0A0R2M706, W6TC28, A0A2R3JNU4, A0A2R3JV27, A0A2K9HZQ3, A0A2S9VKN3, A0A2S9VLI9, A0A2S9W6C1, A0A3M6LM30, F6ISN2, G0LZ50, I9KZF8, T5JQP3, A0A199QGK4, A0A2I9CML5, A0A370A5F1, A0A0R2CUB3, A0A0N6WZF4, A0A0R1UIT0, A0A151G308, A0A165MVY1, A0A165VKF1, A0A1A0DFN1, A0A1E3KU13, A0A1I9RYI4, A0A1S0RUY2, A0A1W6NS92, A0A3P6M9N1, B9V400, B9V404, D7VB43, F9UR86, MIR367, zINPUTSEQ, A0A3B8EP89, A0A0R1UTM3, A0A0R1MKI5, A0A1Y6K3W4, A0A0R1LPV0, A0A0R1JPS5, A0A2T4XPY7, A0A0F3RY97, A0A0R1QVF6, A0A0A7U3E8, A0A0C1Q6G5, A0A1W6N7B3, A0A1W6NJ40, A0A2A3U073, A0A2Z3RBC4, A0A378HCN8, M5AG61, Q03NN7, A0A0R1ZSW9, A0A0R2A395, A0A425XLC5, A0A0R2NTY5, A0A0R2BIX7, A0A1B1V034, A0A1B1V042, A0A1B1V043, A0A0R1LSJ8, A0A1B1V044, A0A0R1WFL2, A0A0R1XFV4, A0A081BIX8, C2ERH2.

Uniprot ID in Cluster 7:

A0A0R1F4U8, A0A2D1KS53, A0A242B7Z0, A0A242GXU2, A0A242LML2, A0A261ERC4, C2FA86, A0A347SSM5, A0A3R6XWA5, A0A347SU50, A0A3R6ZZB5, A0A417ZB28, A0A430A1Q3, A0A0F4L872, A0A0F4LD75, A0A0F4LJB8, A0A0F4LXU6, A0A2Z3HQK0, A0A318MWB7, A0A3M0NW96, A0A3M0P674, A0A3M0PRW3, A0A0C9Q109, A0A0E2BUE8, A0A0M6W8R8, A0A125U781, A0A1F1JLU2, A0A2S3UEF4, A0A422LNK0, A0A422LR44, B2M0U2, K0N2B8, K6R4I0, K6RPT8, K6SSW3, S2NG09, S4ZL55, A0A0F4L0S3, A0A0H0YJ82, A0A179YG78, A0A180B5M2, A0A1B1FMJ9, A0A1F0S498, A0A1Z2EZZ7, A0A2A5L489, A0A370MRC9, G4XR38, K8QQ79, S6C8P7, S0KMI6, A0A2S0KFM7, A0A0R1N5B2, A0A0R1X133, A0A0R2KXP8, A0A2W3Z4N9, A0A347SU58, A0A3R6VB89, A0A3R7CL16, E0NH66, A0A0R2MN97, A0A3P2RA54, A0A1A5VR33, A0A1L6H7R1, A0A3S3XQL9, A0A410LE82, A0A443L1Q2, D2EGV2, K9IEN2, R0EMQ8, Q03C04, A0A1Q2D529, A0A0A7FT69, A0A0F3FST6, A0A174S5I0, A0A345FXJ2, R2XUK7, U4TTB3, A0A0R2JUZ6, W7C728, A0A0R2FQH1, A0A347SPW5, A0A417ZJ96, A0A075TZ28, A0A0R2HEX6, A0A1Y0VTE7, A0A379BPK4, Q03I04, A0A0F4KXZ0, A0A0F4LPC5, A0A0R1RAM9, A0A1E5KS80, X5NW04, A0A2Z3KAR1, A0A3M0P6B4, A0A0C1PNV8, A0A0R2E800, A0A0R2GTV2, A0A3D8NZ13, A0A1V4DH08, A0A0R1F752, A0A0R1EQQ5, A0A249N7L1, C2K0W7, A0A429ZHB3, A0A0F4KYR6, A0A0F4LPD5, A0A3D8TRI4, A0A0R2B5J4, A0A249DCM2, A0A1C3YRR0, A0A3M0NM49, A0A059MX18, A0A0E9E5F0, A0A0H1THQ2, A0A0M2A8D2, A0A0M2APV7, A0A0U1AZ87, A0A0Y4GDZ3, A0A0Y7J9J2, A0A125W929, A0A1G1SAN9, A0A1Q1FXR5, A0A1R4K9I7, A0A1X3B9W4, A0A2S7LY31, A0A2T5D7J7, A0A2Z6BM52, A0A3N3SC04, A0A449DLK7, A0A449FPG0, C7CZB3, C7VF20, D4EMF1, D4EXC1, E0H921, E2Y939, E2YQS1, E2Z082, E6EWN3, E6GIC0, E6GVT1, E6H3G6, E6I9J7, Q82ZP5, R3HWC1, R3J1X6, S4CBG7, U6RYI1, V7ZL28.

## Supplementary Dataset S2: NCBI accession number of metagenomic data used for ShortBRED.

SRS011061, SRS011090, SRS011098, SRS011126, SRS011132, SRS011134, SRS011140, SRS011144, SRS011152, SRS011239, SRS011243, SRS011247, SRS011255, SRS011263, SRS011269, SRS011271, SRS011302, SRS011306, SRS011310, SRS011343, SRS011355, SRS011397, SRS011405, SRS011452, SRS011529, SRS011584, SRS011586, SRS012273, SRS012279, SRS012281, SRS012285, SRS012291, SRS012294, SRS012663, SRS012902, SRS013155, SRS013158, SRS013164, SRS013170, SRS013215, SRS013234, SRS013239, SRS013252, SRS013269, SRS013476, SRS013502, SRS013506, SRS013521, SRS013533, SRS013542, SRS013637, SRS013687, SRS013705, SRS013711, SRS013723, SRS013800, SRS013818, SRS013825, SRS013836, SRS013876, SRS013879, SRS013881, SRS013945, SRS013949, SRS013951, SRS013956, SRS014124, SRS014126, SRS014235, SRS014271, SRS014287, SRS014313, SRS014459, SRS014464, SRS014470, SRS014472, SRS014476, SRS014494, SRS014573, SRS014575, SRS014578, SRS014613, SRS014629, SRS014682, SRS014683, SRS014684, SRS014686, SRS014690, SRS014888, SRS014890, SRS014894, SRS014901, SRS014923, SRS014979, SRS015038, SRS015040, SRS015044, SRS015051, SRS015054, SRS015133, SRS015154, SRS015158, SRS015168, SRS015190, SRS015209, SRS015215, SRS015217, SRS015225, SRS015264, SRS015269, SRS015272, SRS015274, SRS015278, SRS015369, SRS015374, SRS015378, SRS015395, SRS015425, SRS015430, SRS015434, SRS015436, SRS015440, SRS015450, SRS015470, SRS015537, SRS015574, SRS015578, SRS015640, SRS015644, SRS015646, SRS015650, SRS015663, SRS015745, SRS015752, SRS015755, SRS015762, SRS015782, SRS015893, SRS015895, SRS015899, SRS015921, SRS015937, SRS015941, SRS015947, SRS015960, SRS015989, SRS015996, SRS016002, SRS016018, SRS016033, SRS016037, SRS016039, SRS016043, SRS016056, SRS016086, SRS016088, SRS016092, SRS016095, SRS016111, SRS016188, SRS016191, SRS016196, SRS016200, SRS016203, SRS016225, SRS016267, SRS016292, SRS016297, SRS016319, SRS016331, SRS016335, SRS016342, SRS016349, SRS016360, SRS016434, SRS016495, SRS016501, SRS016503, SRS016513, SRS016516, SRS016529, SRS016533, SRS016553, SRS016559, SRS016569, SRS016575, SRS016581, SRS016585, SRS016600, SRS016746, SRS016752, SRS016753, SRS016954, SRS016989, SRS017013, SRS017025, SRS017044, SRS017080, SRS017103, SRS017120, SRS017127, SRS017139, SRS017156, SRS017191, SRS017209, SRS017215, SRS017227, SRS017244, SRS017247, SRS017304, SRS017307, SRS017433, SRS017439, SRS017441, SRS017445, SRS017451, SRS017497, SRS017511, SRS017520, SRS017521, SRS017533, SRS017537, SRS017687, SRS017691, SRS017697, SRS017700, SRS017701, SRS017713, SRS017808, SRS017810, SRS017814, SRS017820, SRS017821, SRS018133, SRS018145, SRS018149, SRS018157, SRS018300, SRS018312, SRS018329, SRS018337, SRS018351, SRS018357, SRS018359, SRS018369, SRS018394, SRS018427, SRS018439, SRS018463, SRS018573, SRS018575, SRS018585, SRS018591, SRS018656, SRS018661, SRS018665, SRS018671, SRS018739, SRS018769, SRS018778, SRS018784, SRS018791, SRS018817, SRS019215, SRS019219, SRS019221, SRS019225, SRS019267, SRS019327, SRS019329, SRS019333, SRS019339, SRS019379, SRS019386, SRS019387, SRS019389, SRS019391, SRS019397, SRS019587, SRS019591, SRS019597, SRS019600, SRS019601, SRS019607, SRS019968, SRS019974, SRS019976, SRS019980, SRS019986, SRS019989, SRS020220, SRS020226, SRS020232, SRS020233, SRS020328, SRS020334, SRS020336, SRS020340, SRS020349, SRS020386, SRS020856, SRS020858, SRS020862, SRS020868, SRS020869, SRS022137, SRS022143, SRS022145, SRS022149, SRS022158, SRS022530, SRS022532, SRS022536, SRS022719, SRS022721, SRS022725, SRS022734, SRS023346, SRS023352, SRS023354, SRS023358, SRS042428, SRS042457, SRS042643, SRS043001, SRS043646, SRS043663, SRS043755, SRS044373, SRS045004, SRS045049, SRS045254, SRS045262, SRS045313, SRS045713, SRS046344, SRS047824, SRS048164, SRS048719, SRS049389, SRS049712, SRS049900, SRS049959, SRS050007, SRS050025, SRS050029, SRS050184, SRS050244, SRS050628, SRS050752, SRS051244, SRS051505, SRS051613, SRS051941, SRS052227, SRS052330, SRS052590, SRS052604, SRS052697, SRS052876, SRS053335, SRS053398, SRS053437, SRS053854, SRS054061, SRS054590, SRS054653, SRS054687, SRS054956, SRS055118, SRS055401, SRS055426, SRS056323, SRS056695, SRS057539, SRS057791, SRS057807, SRS058053, SRS058213, SRS058808.
